1 **A CRISPRi screen of essential genes reveals that proteasome regulation**  
2 **dictates acetic acid tolerance in *Saccharomyces cerevisiae***

3 **Running title: Yeast CRISPRi screen elucidates acetic acid tolerance**

4 Vaskar Mukherjee<sup>1</sup>, Ulrika Lind<sup>2</sup>, Robert P. St. Onge<sup>3</sup>, Anders Blomberg<sup>2</sup>, Yvonne  
5 Nygård<sup>1</sup>#

6

7 <sup>1</sup>Department of Biology and Biological Engineering, Industrial Biotechnology,  
8 Chalmers University of Technology, Gothenburg, Sweden

9 <sup>2</sup> Department of Chemistry & Molecular Biology, University of Gothenburg, Sweden

10 <sup>3</sup>Stanford Genome Technology Center and the Department of Biochemistry, Stanford  
11 University, Palo Alto, CA, USA

12 #Address correspondence to Yvonne Nygård, [yvonne.nygard@chalmers.se](mailto:yvonne.nygard@chalmers.se)

13

14 **ABSTRACT**

15 CRISPR interference (CRISPRi) is a powerful tool to study cellular physiology under  
16 different growth conditions and this technology provides a means for screening  
17 changed expression of essential genes. In this study, a *Saccharomyces cerevisiae*  
18 CRISPRi library was screened for growth in medium supplemented with acetic acid.  
19 Acetic acid is a growth inhibitor challenging the use of yeast for industrial conversion  
20 of lignocellulosic biomasses. Tolerance towards acetic acid that is released during  
21 biomass hydrolysis is crucial for cell factories to be used in biorefineries.

22 The CRISPRi library screened consists of >9,000 strains, where >98% of all essential  
23 and respiratory growth-essential genes were targeted with multiple gRNAs. The  
24 screen was performed using the high-throughput, high-resolution Scan-o-matic  
25 platform, where each strain is analyzed separately. Our study identified that CRISPRi  
26 targeting of genes involved in vesicle formation or organelle transport processes led  
27 to severe growth inhibition during acetic acid stress, emphasizing the importance of  
28 these intracellular membrane structures in maintaining cell vitality. In contrast, strains  
29 in which genes encoding subunits of the 19S regulatory particle of the 26S proteasome  
30 were downregulated had increased tolerance to acetic acid, which we hypothesize is  
31 due to ATP-salvage through an increased abundance of the 20S core particle that  
32 performs ATP-independent protein degradation. This is the first study where a high-  
33 resolution CRISPRi library screening paves the way to understand and bioengineer  
34 the robustness of yeast against acetic acid stress.

## 35 **IMPORTANCE**

36 Acetic acid is inhibitory to the growth of the yeast *Saccharomyces cerevisiae*, causing  
37 ATP starvation and oxidative stress, which leads to sub-optimal production of fuels  
38 and chemicals from lignocellulosic biomass. In this study, where each strain of a  
39 CRISPRi library was characterized individually, many essential and respiratory growth  
40 essential genes that regulate tolerance to acetic acid were identified, providing new  
41 understanding on the stress response of yeast and new targets for the bioengineering  
42 of industrial yeast. Our findings on the fine-tuning of the expression of proteasomal  
43 genes leading to increased tolerance to acetic acid suggests that this could be a novel  
44 strategy for increasing stress tolerance, leading to improved strains for production of  
45 biobased chemicals.

46 **Keywords:** CRISPR interference, yeast, high-throughput screening, acetic acid  
47 tolerance, essential genes, transcriptional regulation, phenomics, proteasome,  
48 oxidative stress.

49

## 50 **INTRODUCTION**

51 Systematic profiling of relationships between genotypes and phenotypes provides  
52 novel understanding of fundamental biology and suggests leads for improving strains  
53 for various biotechnology applications. Quantitative phenotyping of different  
54 collections of strains with systematic genetic perturbations, such as the yeast deletion  
55 collection (1), the yeast GFP clone collection (2) or yeast overexpression collections  
56 (3, 4) has allowed construction of yeast regulatory network models. Nonetheless, the  
57 function of a large number of genes remains unknown and many known genes may  
58 have more functions yet to be discovered. Notably, even small perturbations in  
59 expression of genes can lead to large phenotypic changes (5).

60 In recent years, the CRISPR interference (CRISPRi) technology has been  
61 demonstrated as a very efficient tool to alter gene regulation (6). This technology  
62 exploits an RNA-guided, endonuclease-dead Cas9 (dCas9), or other CRISPR-  
63 associated proteins, for controlled downregulation of genes by directing dCas9-fusions  
64 to their promoter region (7). This allows alteration of expression of essential genes, as  
65 partial loss-of-function phenotypes can be induced by conditional expression of *dCas9*  
66 and the target-gene specific guide RNA (gRNA). Furthermore, as the strength of  
67 expression alteration is greatly dependent on the efficiency and positioning of the  
68 gRNA, one can study a gradient of repression by testing multiple gRNA sequences for

69 each target gene (8, 9). Based on this technology, several CRISPRi strain libraries  
70 were constructed for many species, including *Saccharomyces cerevisiae* (9-13).

71 In the first CRISPRi library constructed for yeast (12), transcriptional interference was  
72 achieved with an integrated dCas9-Mxi1 repressor (14) and a tetracycline-regulatable  
73 repressor (TetR) that controls the expression of the gRNA (8). In this strain collection  
74 of roughly 9,000 strains, nearly 99% of the essential and 98% of the respiratory growth  
75 essential genes have been targeted with up to 17 gRNAs per target gene (12).  
76 Recently, the construction and phenotypic screening of CRISPR technology-based *S.*  
77 *cerevisiae* libraries have been demonstrated to be very efficient to identify  
78 bioengineering genetic candidates to increase production of  $\beta$ -carotene or  
79 endoglucanase (15), regulate polyketide synthesis (16) or improve tolerance to furfural  
80 (11) or lignocellulose hydrolysate (13).

81 Lignocellulose hydrolysates contain not only fermentable sugars but also various  
82 amounts of other compounds, including furfural, different weak acids, and phenolic  
83 compounds, that inhibit yeast growth (reviewed by Jönsson et al. (17)). Among these  
84 compounds, toxicity by acetic acid is one of the most limiting factors for the production  
85 of alternative fuels and chemicals from lignocellulosic biomass using *S. cerevisiae*.  
86 Acetic acid is formed during hydrolysis of biomass and is inhibitory to yeast even at  
87 low concentrations (17). Tolerance to acetic acid is a very complex trait, where many  
88 genetic elements play together to control the phenotype (reviewed by Fernández-Niño  
89 et al. (18)). As a result, rational designing of acetic acid tolerant strains is particularly  
90 challenging (19).

91 In this study, a CRISPRi library (12) was used to screen essential and respiratory  
92 growth essential genes for roles in providing tolerance towards acetic acid in *S.*

93 *cerevisiae*. The library was characterized using the automated high-resolution and  
94 high-throughput Scan-o-matic platform (20), where each strain is analyzed separately  
95 for its growth rate on solid medium. A set of strains with interesting acetic acid growth  
96 profiles were verified in liquid medium and the repression of some of these genes was  
97 verified by qPCR. The library enabled us to confirm previously known genes involved  
98 in the response to acetic acid and to identify several novel genes the regulation of  
99 which could be altered to increase tolerance towards acetic acid and thereby improve  
100 production hosts for production of biocommodities from lignocellulosic biomass.

## 101 **RESULTS**

### 102 **High-throughput phenomics of the CRISPRi strains**

103 To identify genes involved in tolerance of *S. cerevisiae* to acetic acid, we performed a  
104 high-throughput growth screen of a CRISPRi library (9,078 strains) targeting essential  
105 and respiratory growth essential genes (12) using the Scan-o-matic system (20) (Fig.  
106 1). The screens were independently duplicated, in total resulting in >27,000 images,  
107 and the image analysis generated >42 million data-points and >140,000 growth  
108 curves. Our large-scale screen showed rather good repeatability (Fig. 2A). Linear  
109 regression, taking all strains into account, showed that 22% (co-efficient of  
110 determination i.e.  $R^2 = 0.22$ , F-test P-value  $< 2.2e-16$ ) of the phenotypic variability  
111 between the two independent screens could be explained by the linear model  
112 (Pearson correlation coefficient  $r = 0.47$ ). However, taking only the strains with distinct  
113 phenotypes into account i.e., statistically significant acetic acid sensitive or tolerant  
114 strains (Fig. 2A), 79% ( $R^2 = 0.79$ , F-test P-value  $< 2.2e-16$ ) of the phenotypic variability  
115 between the two independent experiments could be explained by the linear model ( $r$   
116  $= 0.89$ ).

117 The CRISPRi strains showed limited phenotypic effects in basal condition and the  
118 generation time of 8,958 strains (99% of the strains of the library) was within  $\pm 10\%$  of  
119 the generation time of the control strain (Fig. 2B). Only 92 strains (1%) displayed  
120 complete growth inhibition in basal condition.

### 121 **CRISPRi-based gene repression imposed large phenotypic effects under acetic** 122 **acid stress**

123 In contrast to basal medium, large variations in generation time were observed among  
124 the CRISPRi strains at 150 mM of acetic acid (Fig. 2B and C). A great proportion of  
125 the CRISPRi strains displayed slower growth in response to acetic acid, with 1,040  
126 strains ( $\approx 11\%$ ) having  $>10\%$  higher generation time than the control strain. It was also  
127 clear from the growth curves that strains in acetic acid medium exhibited a rather long  
128 lag-phase before growth was resumed (Fig. 1). Still, 133 strains ( $\approx 1\%$ ) displayed a  
129  $>10\%$  shorter generation time than the control strain in response to acetic acid (Fig.  
130 2B). In conclusion, the addition of acetic acid to the growth medium had a great impact  
131 on the growth of many of the strains in the CRISPRi library. The raw data and all the  
132 subsequent analytical output for all strains in the library are available in the  
133 supplementary .xlsx file, in Table S1 and S2.

### 134 **Integrative data-analysis connected yeast essential genes to acetic acid** 135 **tolerance and sensitivity**

136 In order to study gene-specific effects on acetic acid tolerance/sensitivity, we  
137 constructed relative generation times (LPI: log phenotypic index) where growth in  
138 acetic acid was put in relation to growth in basal medium. Thus, those strains that  
139 exhibited a general growth-defect and grew poorly in both media were not identified  
140 as specifically sensitive to acetic acid.

141 Eleven % of all the strains (i.e. 954 strains, including 108 strains that did not grow in  
142 acetic acid) in the library had an increased relative generation time, while 19% of all  
143 the strains (1,704) had a decreased relative generation under acetic acid stress (Fig.  
144 2C). A combined statistical (false discovery rate adjusted P-value  $\leq 0.1$ ) and effect  
145 size threshold was applied, which allowed the identification of 959 strains  
146 (corresponding to 665 genes) as acetic acid sensitive or tolerant (Fig. 2D). Out of  
147 these, 478 strains with gRNAs targeting a total of 370 genes had a significantly  
148 decreased relative generation time (Fig. 2D and Table S3), and thereby displayed  
149 acetic acid tolerance. The decrease in relative generation time seen was relatively  
150 small with only few strains showing a higher level of improvement, with RPN9-TRg-4  
151 (targeting *RPN9*, encoding a regulatory subunit of the 26S proteasome; 27%  
152 improvement) and RGL1-NRg-7 (targeting *RGL1*, encoding a regulator of Rho1p  
153 signaling; 18% improvement) being the most acetic acid tolerant strains identified. A  
154 total of 498 strains, with gRNAs targeting a total of 367 genes, displayed acetic acid  
155 sensitivity (Fig. 2D and Table S4). Out of these, 17 strains that grew well in basal  
156 condition were completely inhibited (or the strains grew extremely slowly, generation  
157 time > 48h) in the presence of 150 mM acetic acid. The range of sensitivities was  
158 rather wide and the relative generation time for 34 strains was greater than 2-fold  
159 compared to the control strain, with ARC40-NRg-3 (targeting *ARC40*, encoding a  
160 subunit of the ARP2/3 complex; 219% extension) and VPS45-NRg-4 (targeting  
161 *VPS45*, encoding a protein essential for vacuolar protein sorting; 206% extension)  
162 being the most acetic acid sensitive strains. Thus, a rather large number of CRISPRi  
163 strains showed an altered response to acetic acid, where about half showed increased  
164 sensitivity and half increased tolerance.

165 **Growth in liquid media and qPCR expression analysis validated the large-scale**  
166 **phenomics results**

167 To validate the phenomics data obtained from cultures grown on solid medium, the  
168 growth of 183 strains (including sensitive and tolerant strains as well as some  
169 controls), was analyzed also in liquid medium. In the liquid validation experiment both  
170 150 mM and 125 mM acetic acid media were included, as the phenotypic effects were  
171 seen to be more drastic in liquid compared to solid medium. A high proportion of the  
172 strains did not grow at all in liquid medium at 150 mM, the concentration that was used  
173 in the screen on solid medium. The relative generation time in liquid medium showed  
174 a strong correlation ( $r = 0.86$ ) with the corresponding Scan-o-matic data for growth on  
175 solid medium (Fig. 3, for representative growth curves of selected strains in liquid  
176 medium, see Fig. S1). Linear regression showed that 73% ( $R^2 = 0.73$ , F-test P-value  
177  $< 2.2e-16$ ) of the phenotypic variation between these two independent experimental  
178 methods can be explained by the linear model. It should be noted that some strains  
179 can display, for biological reasons, different growth responses on solid and liquid  
180 media (20). We concluded that the data from the large-scale screen on solid medium  
181 was in excellent agreement with the liquid growth analysis.

182 The initial screen on solid medium selected tolerant and sensitive strains only based  
183 on changes in growth rate (generation time). In addition to determination of generation  
184 time, the growth analysis in liquid media also allowed detailed analysis of growth lag  
185 and biomass yield. A sharp reduction in biomass yield was observed with increasing  
186 acetic acid stress (Fig. S2). During growth in liquid media, the generation time and  
187 yield of the strains showed a strong negative correlation both at 125 ( $r = - 0.91$ ) and  
188 150 mM ( $r = - 0.84$ ) acetic acid, thus slow growth correlated with low yield during the



189 cultivation. On the other hand, neither generation time nor yield correlated with the lag  
190 phase indicating that the length of the lag-phase is an independent physiological  
191 feature under acetic acid stress. The lag phase of strains grown in the presence of  
192 acetic acid was much longer compared to growth in basal medium, whereas the  
193 changes in generation time determined were less pronounced between the two types  
194 of media. An overview of the relative performance of the strains characterized in liquid  
195 medium is demonstrated using a heatmap in Fig. S3.

196 To investigate the relationship between the level of transcriptional repression of the  
197 target genes and the observed phenotypes, qPCR was performed for a selected set  
198 of strains with different generation times. The chosen strains had gRNAs targeting  
199 *RPN9*, *RPT4*, *GLC7* or *YPI1* (Fig. 4, S4). For most strains, different levels of repression  
200 of the target gene was observed using different gRNAs. For strains with gRNAs  
201 targeting *RPN9* or *GLC7*, the phenotype observed (faster growth in the case of *RPN9*  
202 and slower growth for *GLC7*) showed strong correlations with the reduction of  
203 expression levels of the target genes ( $r = 0.94$  and  $r = -0.79$  for *RPN9* and *GLC7*,  
204 respectively). The expression of *GLC7* in strains with the gRNAs *GLC7*-TRg-2 and  
205 *GLC7*-NRg-4 was strongly down-regulated (by  $\approx 93\%$  and  $\approx 82\%$ ), and these two  
206 strains were also the most sensitive to acetic acid (+133% and +39% in relative  
207 generation time, Fig. 4C). For strains with gRNAs targeting *RPT4* or *YPI1*, there was  
208 no clear correlation between the change in expression levels and generation times  
209 (Fig. 4B and D).

210 **Membrane bound organelles and vesicle mediated secretory pathways are of**  
211 **particular importance under acetic acid stress**

212 Individual repression of 367 genes in 498 strains resulted in acetic acid sensitivity. Out  
213 of those genes, 276 are generally essential (represented by 384 strains) and 91 are  
214 respiratory growth essential genes (represented by 114 strains) (Fig. 2D, Table S4).

215 Gene Ontology (GO) enrichment analysis of genes for which repression imposed  
216 acetic acid sensitivity, indicated that a fully functional bounding membrane of different  
217 organelles is of great importance to handle acetic acid stress in *S. cerevisiae* (adjusted  
218 P-value = 0.00033, Fig. 5). The Golgi apparatus, endoplasmic reticulum (ER),  
219 vesicular structures such as the endosome, the vacuole and the organelle-associated  
220 intracellular transport pathways were found to be of particular importance (Fig. S5 and  
221 S6). Furthermore, several genes involved in vesicle mediated transport were enriched  
222 (adjusted P-value = 5.40E-05). Many strains with gRNAs targeting genes encoding  
223 the vacuolar membrane ATPase or GTPases required for vacuolar sorting (*VMA3*,  
224 *VMA7*, *VMA11*, *VPS1*, *VPS4*, *VPS36*, *VPS45* or *VPS53*) were found to be sensitive  
225 to acetic acid (Table 1). Moreover, the transport of luminal and membrane protein  
226 cargoes between the ER-Golgi segment of secretory pathway using COPI and COPII  
227 coated vesicles appeared crucial for growth under acetic acid stress. Strains with  
228 gRNAs targeting genes encoding beta' (*SEC27*), gamma (*SEC21*) and Zeta (*RET3*)  
229 subunits of the COPI vesicle coat displayed severe sensitivity to acetic acid (Table 1).  
230 Similarly, CRISPRi repression of several genes that encode components involved in  
231 the regulation of COPII vesicle coating formation (*SEC12*, *SAR1*, *SEC23*), COPII  
232 vesicle cargo loading (*SEC24*), and components that facilitate COPII vesicle budding  
233 (*SEC31*, *YPT1*, *SEC13*) showed significant acetic acid sensitivity (Table 1).

234 In addition to COPI and COPII vesicle coating, our results also elucidated the  
235 importance of SNARE proteins, which mediate exocytosis and vesicle fusion with

236 membrane-bound compartments. Our study included strains with gRNAs targeting 14  
237 out of 24 known genes encoding SNARE proteins in *S. cerevisiae*. CRISPRi  
238 repression of 8 out of those 14 genes induced significant acetic acid sensitivity. In  
239 particular, CRISPRi repression of genes encoding v-SNARE proteins (proteins that  
240 are on the vesicle membrane) or t-SNARE proteins (proteins that are on the target  
241 membrane that the vesicles are fused to) increased the relative generation time in the  
242 presence of acetic acid (Table 1). We conclude that organelles and vesicle transport  
243 were highly enriched among sensitive strains, much in line with earlier reported  
244 features that are important for normal growth in acetic acid (21, 22).

245 **Repression of *YPI1*, involved in the regulation of the type I protein phosphatase**  
246 ***Glc7*, induced acetic acid tolerance**

247 Accumulation of the storage carbohydrate glycogen has earlier been reported to be  
248 critical for growth under acetic acid stress (23, 24). *GLC7* encodes a type 1 protein  
249 phosphatase that contributes to the dephosphorylation and hence activation of  
250 glycogen synthases (25). We found that 3 out of 5 strains with gRNAs targeting *GLC7*  
251 showed significant acetic acid sensitivity, increasing the relative generation time by  
252 16-120% (Fig. 4C). On the contrary, 5 strains with gRNAs targeting *YPI1*, a gene which  
253 has been reported to be involved in the regulation of *Glc7*, displayed significant acetic  
254 acid tolerance and reduced the relative generation time by 6-14% (Fig. 4D). The data  
255 obtained from solid medium was supported by data of strains growing in liquid  
256 medium, where one strain with a gRNA targeting *GLC7* was included. This strain  
257 showed significant acetic acid sensitivity (219% increment of relative generation time  
258 and 42% longer lag phase) at 125mM. In contrast, 3 out of 4 *YPI1* strains that were  
259 included in liquid growth experiment showed significant acetic acid tolerance (11-13%

260 reduction in relative generation time and 3-11% reduction in lag phase in liquid  
261 medium with 125mM of acetic acid). In summary, our data give support for that Ypi1  
262 acts as a negative regulator of Glc7 under acetic acid stress, and that it plays an  
263 important role during growth in acetic acid conditions, possibly by affecting the  
264 accumulation of glycogen.

### 265 **The proteasome regulatory subunits have a major role in acetic acid tolerance**

266 Two GO-terms, i.e. “proteasome complex” and “proteasome regulatory particle”, were  
267 significantly enriched in the GO-analysis of the 370 genes that when repressed by the  
268 CRISPRi system displayed increased acetic acid tolerance (Fig. 5). Most of the genes  
269 connected to these GO terms encode subunits of the 19S regulatory particles (RPs)  
270 of the 26S proteasome (Fig. 6, S7). Among these were 6 genes (i.e. *RPN3*, *RPN5*,  
271 *RPN6*, *RPN8*, *RPN9*, *RPN12*; Table 2) encoding subunits for the RP lid assembly. The  
272 CRISPRi targeting of *RPN9* was most prominent with 5 out of 8 gRNAs inducing a  
273 significant decrease in the relative generation time, and multiple gRNAs targeting  
274 *RPN6* and *RPN5* also induced acetic acid tolerance (Table 2). Overall, the different  
275 gRNAs for these different RP lid assembly genes reduced the relative generation time  
276 in the range of 2 - 27% (Table 2).

277 The performance of ten strains with gRNAs targeting subunits of the 19S regulatory  
278 particle lid complex was also characterized in liquid media. Both strains with gRNAs  
279 inducing tolerance and gRNAs failing to give a measurable phenotype on solid  
280 medium were included. Most of the strains (4 out of 6) identified as tolerant on solid  
281 medium (with gRNAs targeting *RPN9* or *RPN12*) also showed significant acetic acid  
282 tolerance in liquid medium, with 8-12% reduction in relative generation time and 4-8%  
283 reduced lag phase at 125 mM of acetic acid (Fig. 7A).

284 In addition to acetic acid tolerance achieved by targeting the lid of the 19S regulatory  
285 particle, several CRISPRi strains targeting genes encoding subunits of the 19S RP  
286 base assembly showed significant acetic acid tolerance (Fig. 6 and Table 2). A  
287 reduction of 3-12% of the relative generation time was observed for strains with gRNAs  
288 targeting the RP base assembly subunits *RPT1*, *RPT2*, *RPT4*, *RPT5* or *RPT6*. The  
289 fitness benefit of targeting *RPT4* was confirmed in liquid medium, where the strain  
290 RPT4-NRg2 (Fig. 7A) had a 22% reduced relative generation time at 125 mM of acetic  
291 acid.

292 In contrast to the increased tolerance seen when targeting the 19S regulatory particle,  
293 CRISPRi targeting of genes encoding the 20S proteasome predominantly led to acetic  
294 acid sensitivity (Fig. 6). The relative generation times were increased by 15-74% in  
295 strains with gRNAs targeting *SCL1*, *PRE5*, *PRE4* or *PUP3* (Table 2). This trend was  
296 confirmed in liquid medium, where 6 out of 11 strains with gRNAs targeting genes  
297 encoding 20S proteasomal subunits showed significant acetic acid sensitivity (Fig.  
298 7A). Thus, our data indicates that the proteasome and its different sub-parts play  
299 critical and differential roles in regulating growth in medium with acetic acid.

## 300 **DISCUSSION**

### 301 *Bioengineering of essential genes in yeast using the CRISPRi technology*

302 A number of large-scale, systematic gene-by-phenotype analyses of essential genes  
303 have previously been performed, by phenotyping either heterozygous deletion  
304 mutants or strains carrying temperature sensitive alleles (26-29). Nonetheless, the use  
305 of heterozygous deletion mutants is limited by haplosufficiency, as one copy of a gene  
306 often is adequate for the normal function of diploids (30). Moreover, temperature-

307 dependent side-effects may influence the results when studying thermosensitive  
308 alleles (28, 31).

309 In previous studies where the CRISPRi technology was applied for massive genotype–  
310 phenotype mapping in *S. cerevisiae* (9, 11-13), the strains were pooled, and screened  
311 for competitive growth. Although competitive growth assays have the advantage of  
312 throughput, they come with a major weakness; the nutrient-specific advantage for  
313 cells/strains with shorter lag phase is amplified. Single cell analysis has showed  
314 massive heterogeneity in lag-phase within clonal populations of *S. cerevisiae* (32),  
315 which may introduce noise in the outcome of competitive growth assays. Moreover,  
316 the characterization of a population enriched after a specific time provides merely an  
317 endpoint observation. In the previously described competitive growth assays of whole  
318 genome CRISPRi libraries (11, 13) the genes identified to give beneficial phenotypes  
319 when repressed, have not been essential. This is likely due to the phenotypes of  
320 strains with altered expression of essential genes not being as pronounced as the  
321 phenotypes of the strains becoming enriched or due to the alteration in expression  
322 being detrimental. Often the genetic or environmental effects on cellular fitness are  
323 relatively small (33, 34), and thus highly accurate measurement methodologies are  
324 required to capture subtle differences in growth phenotypes. Therefore, we used the  
325 phenomics platform Scan-o-matic (20), to individually grow each of the >9,000 strains  
326 of a CRISPRi strain library. The generation time of each strain was generated from  
327 high-resolution growth curves without the influence/competition from other strains.

328 During growth in basal condition, we found that most of the CRISPRi strains grew with  
329 a generation time similar or just slightly slower compared to the generation time of the  
330 control strains. In medium with acetic acid, there was a great variability between the

331 strains, some growing faster and as expected, many growing much slower. Only about  
332 1% of the strains of the library did not grow in basal condition. This in line with what  
333 Smith et al. (12) observed when growing the pooled strains in YPD medium; after 10  
334 doublings the DNA barcodes associated with 170 strains dropped below background.  
335 Our qPCR profiling of selected genes of strains during mid-exponential growth showed  
336 that both at basal condition and under acetic acid stress, different levels of repression  
337 was achieved by targeting the same gene with different gRNAs (Fig. 4). For the tested  
338 genes, we observed that the repression of expression was more pronounced in basal  
339 medium compared to medium supplemented with acetic acid (Fig. S4), indicating that  
340 the repression by the CRISPRi system may be influenced by the environmental  
341 condition. High concentrations of acetic acid are known to cause an increased lag  
342 phase (35). We observed that several of the strains scored for a change in growth rate  
343 also displayed defects or improvements on the length of the lag-phase, while some  
344 did not (Fig. S3).

345 *CRISPRi targeting vesicle, organelle or vesicle transport encoding genes causes*  
346 *acetic acid sensitivity*

347 Previous large-scale screens of strains have identified many genes with widely diverse  
348 functions, the deletions of which increased the susceptibility of yeast to acetic acid (22,  
349 36). In line with our findings, Sousa et al. (22) reported that deleting genes involved in  
350 vesicular traffic from the Golgi to the endosome and the vacuole increased sensitivity  
351 to acetic acid. In addition, endocytic inhibition has been observed in response to acetic  
352 acid and other environmental stressors (37). Many of the acetic acid sensitive strains  
353 in our study had gRNAs targeting genes encoding different proteins involved in the  
354 formation and activity of COPI and COPII vesicles or SNARE proteins (Table 1). The

355 COPI and COPII vesicles transport proteins between the ER and the Golgi (reviewed  
356 by Szul and Sztul (38)), whereas SNARE proteins mediate exocytosis and vesicle  
357 fusion with different membrane-bound compartments (reviewed by Han et al. (39)). It  
358 has been reported that acetic acid causes ER stress and induces the unfolded protein  
359 response, as misfolded proteins accumulate in the ER (40). An earlier study, screening  
360 the deletion strain collection reported ER, Golgi, and vacuolar transport processes as  
361 important for resistance to a vast collection of small molecules or environmental stress  
362 conditions, including acetic acid treatment (41).

363 The deletions of genes encoding the vacuolar membrane ATPase complex (*VMA2-8*,  
364 *13*, *16*, *21*, *22*) has been shown to decrease the tolerance to acetic acid (22, 36),  
365 presumably as cells struggle to maintain a neutral cytosolic pH (42). Similarly, single  
366 gene deletions of VPS genes (encoding a GTPases required for vacuolar sorting) have  
367 been shown to result in a drastically enhanced sensitivity to acetic acid and a drop in  
368 intracellular pH (43). In line with these studies, we found strains with gRNAs targeting  
369 several vacuolar ATPase related genes (encoding VMA and VPS complexes; Table  
370 1) to be among the sensitive strains, highlighting the importance of the vacuole in  
371 response to acetic acid stress.

### 372 *Regulation of genes involved in glycogen accumulation influence acetic acid tolerance*

373 Glycogen serves as a fuel reserve for cells and accumulates when growth conditions  
374 deteriorate as a means of adapting to stress such as nutrient-, carbon- or energy-  
375 limitation (44), or acetic acid treatment (23, 24). Glycogen is produced from glucose-  
376 6 phosphate via glycogen synthases that are activated by dephosphorylation by e.g.  
377 the Glc7 phosphatase (25).



378 Hueso et al. (45) demonstrated that overexpression of a functional, 3'-truncated  
379 version of the *GLC7* gene improved acetic acid tolerance. In our study, 3 strains with  
380 gRNAs targeting *GLC7* showed strong acetic acid sensitivity (Fig. 4C). Ypi1 was  
381 initially reported to be an inhibitor of Glc7 (46), while it was later shown to positively  
382 regulate Glc7 activity in the nucleus (47). Overexpression of *YPI1* has been shown to  
383 reduce glycogen levels (46). Our study showed that downregulation of *YPI1*, encoding  
384 a regulatory subunit of the type I protein phosphatase Glc7, conferred acetic acid  
385 tolerance. Five strains with gRNAs targeting *YPI1* displayed a significant decrease in  
386 generation time when subjected to acetic acid, and the downregulation of *YPI1* in  
387 these CRISPRi strains was confirmed by qPCR (Fig. 4D).

388 In light with the fact that both Ypi1 and Glc7 have many different roles in maintaining  
389 cell homeostasis beyond glycogen synthesis, we propose that a CRISPRi-mediated  
390 repression of *YPI1* may be favorable for the cells under acetic acid stress, likely due  
391 to increased glycogen levels in the cells. Similarly, we suggest that CRISPRi strains  
392 where *GLC7* is repressed may have decreased intracellular glycogen content, thus  
393 rendering them more sensitive to acetic acid. Still it may be that other regulatory roles  
394 of Ypi1 and Glc7 are behind the acetic acid resistance/sensitivity identified for some  
395 of the CRISPRi strains and determination of this needs further study.

396 *Adapting proteasomal degradation of oxidized proteins to save ATP increases acetic*  
397 *acid tolerance*

398 While the best-known function of the proteasome is ATP-dependent protein  
399 degradation through the 26S ubiquitin-proteasome system, the unbound, ATP-  
400 independent, 20S proteasome is the main protease responsible for degrading oxidized  
401 proteins (reviewed by Reynes et al. (48)). The 26S proteasomal complex consists of

402 one 20S core particle and two 19S regulatory particles that are further divided into lid-  
403 and base-assemblies. In our study, many of the strains with increased acetic acid  
404 tolerance had gRNAs targeting genes encoding subunits of the 19S regulatory particle  
405 of the proteasome (Fig. 6 and 7A).

406 Many studies report on accumulation of reactive oxygen species (ROS) under acetic  
407 acid stress and reactive oxygen species are well known to cause protein oxidation and  
408 even induce programmed-cell-death in cells upon acetic acid stress (reviewed by  
409 Guaragnella et al. (49)). Yeast under oxidative stress respond to the accumulation of  
410 ROS with a decrease in cellular ATP concentration (50). Acetic acid that enters the  
411 cell dissociates to protons and acetate ions at the near-neutral cytosolic pH and the  
412 charged acetate ions are unable to diffuse through the plasma membrane and thus  
413 accumulate intracellularly (reviewed by Palma et al. (42)). Therefore, acetic acid  
414 stress, in particular pumping out excess protons from the cytosol to the extracellular  
415 space by H<sup>+</sup>-ATPase pumps in the plasma membrane and from the cytosol to the  
416 vacuole by the vacuolar H<sup>+</sup>-ATPases, causes a reduction in ATP (42). Moreover, the  
417 accumulation of ROS has been reported to induce a metabolic shift from glycolysis  
418 towards the pentose phosphate pathway in order to increase the production of  
419 NADPH, an essential cofactor to run the antioxidant systems, which leads to reduction  
420 in ATP generation (51). Consequently, ATP conservation by reducing the activity of  
421 ATP-dependent processes could offer yeast a fitness benefit against acetic acid  
422 stress.

423 The 20S core particle on its own performs ubiquitin- and ATP-independent  
424 degradation of proteins. Under acetic acid stress, ROS accumulation triggers protein  
425 oxidation that leads to protein unfolding (52). The inner proteolytic chamber of the 20S

426 core particle is only accessible to unfolded proteins and moderately oxidized proteins  
427 are ideal substrates for the 20S proteasome (53-55). We hypothesize that the  
428 repression of subunits of the 19S regulatory particle increases the abundance of free  
429 20S core particles, which offers the cell an alternative to the ATP expensive 26S  
430 proteasome mediated protein degradation. In line with this, it has been reported that  
431 even mild oxidative stress reversibly inactivates both the ubiquitin  
432 activating/conjugating system and the 26S proteasome activity but does not impact  
433 the functionality of the 20S core particle (56, 57). Therefore, an increased abundance  
434 of the 20S core particle alone in the strains where the CRISPRi system targets genes  
435 encoding subunits of the 19S regulatory particle could allow more efficient ATP-  
436 independent degradation of oxidized proteins, thus conferring yeast a fitness benefit  
437 during acetic acid stress (Fig. 8).

438 A total of five CRISPRi strains with gRNAs targeting *RPN9* (encoding a subunit of the  
439 19S regulatory lid-assembly) had significantly decreased generation times in medium  
440 supplemented with acetic acid (Table 2). This gives confidence that downregulation of  
441 *RPN9* provides a means to improve acetic acid tolerance. Previously, an *rpn9* mutant  
442 with defective assembly of the 26S proteasome and reduced 26S proteasome activity,  
443 was shown to be more resistant to hydrogen peroxide that is a common stressor used  
444 to enforce oxidative stress (58). Moreover, this *rpn9* mutant was able to degrade  
445 carbonylated (oxidized) proteins more efficiently than the wild type strain and it  
446 displayed an increased 20S-dependent proteasome activity (58). In our study, we  
447 observed that the yields of strains with gRNAs targeting the 19S lid or base of the  
448 proteasome was increased for strains growing in acetic acid whereas the yield of  
449 strains with gRNAs targeting the 20S CP of the proteasome was decreased (Fig. 7B).  
450 It seems plausible that the repression of genes encoding subunits of the 19S lid lead

451 to decreased ATP-expensive 26S activity and that this ATP saving contributed to a  
452 concomitant increment in biomass.

453 Our qPCR results showed that the level of repression of *RPN9* or *RPT4* (encoding a  
454 subunit of the 19S regulatory base-assembly) was greatly dependent on the gRNA of  
455 the strains (Fig. 4A and B). For *RPN9* there was a strong correlation between  
456 expression level and acetic acid tolerance, indicating that fine tuning the 20S and 26S  
457 proteasomal regulation could be an efficient strategy to bioengineer acetic acid  
458 tolerant industrial yeast strains (Fig. 4A). In line with this, a recent study showed that  
459 the downregulation of *RPT5* (encoding a subunit of the 19S base-assembly) induced  
460 tolerance against oxidative stress (59). In our study, down-regulation of *RPT4* was for  
461 3 out of 5 strains with gRNAs targeting this gene shown to improve acetic acid  
462 tolerance (Fig. 4B and S3B). Nonetheless, the generation time of RPT4-TRg-1 with a  
463 clear repression of *RPT4* was increased. We argue that a too strong repression of an  
464 essential gene is likely to be detrimental, highlighting the need for a fine-tuned  
465 expression when engineering tolerance. While off-target effects of gRNAs as well as  
466 gRNAs failing to give a phenotype is a known challenge of the CRISPRi technology,  
467 screening several strains with different gRNAs and identifying multiple strains with  
468 similar phenotypes gives confidence in a phenotype being a result of the gene  
469 repression itself (12). In our study, a total of 28 strains with gRNAs targeting  
470 proteasomal genes were identified as tolerant or sensitive (Table 2), which gives great  
471 confidence for us to elaborate on the role of the proteasome during acetic acid stress.

472 In conclusion, our study identified many essential and respiratory growth essential  
473 genes that regulate tolerance to acetic acid. CRISPRi-mediated repression of genes  
474 involved in vesicle formation or organelle transport processes led to severe growth

475 inhibition during acetic acid stress, emphasizing the importance of these intracellular  
476 membrane structures in maintaining cell vitality. The data also suggests that an  
477 increased activity of the ATP-independent protein degradation by the 20S core is an  
478 efficient way of counteracting acetic acid stress. This mechanism may ensure ATP  
479 savings, allowing proton extrusion and an increased biomass yield. A fine-tuned  
480 expression of proteasomal genes could be a strategy for increasing stress tolerance  
481 of yeast, leading to improved strains for production of biobased chemicals.

## 482 **MATERIALS AND METHODS**

### 483 **Yeast strain library**

484 The CRISPRi strain library (12) used in this study contains 9,078 strains, each of which  
485 has an integrated dCas9-Mxi1 repressor (14). The strains also contain a tetracycline-  
486 regulatable repressor (TetR), where the TetR controls a modified Pol III promoter  
487 (TetO-PRPR1) that drives the expression of unique gRNAs (Fig. 1). Thus, the gRNAs  
488 are expressed in the presence of the inducing agent, anhydrotetracycline (ATc). Each  
489 strain in this library expresses a unique gRNA that in combination with dCas9-Mxi1,  
490 targets 1,108 of the 1,117 (99.2%) essential genes (30) and 505 of 514 (98.2%)  
491 respiratory growth essential genes (60, 61) in *S. cerevisiae* (Fig. S8A and B). For most  
492 of the genes (1,474 out of 1,617), there are at-least three and up to 17 strains (mean  
493  $\approx 5$ ), with different gRNAs targeting the same gene in the library (Fig. S8C). 93% of  
494 the unique gRNAs were designed within 200 bp upstream of the transcription starting  
495 site of the respective target gene (Fig. S8D). Depending on the targeting location of  
496 the gRNA in the promoter, genetic repression ranging from very strong to weak can  
497 be achieved (8). This produces strains that under ATc induction have different levels  
498 of repression of the same gene relative to the native expression level. Moreover, 20  
499 strains in the CRISPRi library have gRNAs that are non-homologous to the *S.*

500 *cerevisiae* genome and function as control strains (Fig. S8B). The CRISPRi strains  
501 were stored in YP Glycerol stock solution (17% Glycerol (v/v), 10 g/l Yeast extract, 20  
502 g/l Bacto-peptone). The whole collection was kept in 24 microtiter plates (MTP 384  
503 well format). Unless otherwise mentioned, all chemicals were purchased from Merck.

#### 504 **ATc titration in YNB medium**

505 Synthetic defined medium was used to identify acetic acid-specific effects, excluding  
506 compounds present in rich medium that might confound the interpretation of our data.  
507 To obtain appropriate gene suppression in our set-up, we adjusted the concentration  
508 of ATc in relation to what had been proposed earlier for rich-media liquid cultures (12).  
509 The concentration of ATc sufficient to induce high level of gRNA expression in the  
510 CRISPRi strains growing on YNB agar media, was determined by a qualitative spot  
511 test assay with selected strains (Fig. S9A). These strains were selected based on the  
512 competitive growth assay of the CRISPRi library in liquid YPD medium with and  
513 without 250 ng/ml of ATc by Smith et al. (12). This study showed that growth of the  
514 strains with gRNA targeting the essential genes *ACT1* (ACT1-NRg-5:  
515 TTAACAAGAGAGATTGGGA, ACT1-NRg-8: ATTTCAAAAAGGAGAGAGAG),  
516 *VPS1* (VPS1-TRg-1: GCCGGGTCACCCAAAGACTT) and *SEC21* (SEC21-NRg-5:  
517 GTCGTAGTGAATGACACAAG) was nearly or completely inhibited, as these essential  
518 genes, targeted by the gRNAs of the strains, were strongly repressed. These strains,  
519 as well as two control strains i.e. Ctrl\_CC11 (CC11: CCCAGTAGCTGTCGGTAGCG)  
520 and Ctrl\_CC23 (CC23: AGGGGTGCTAGAGGTTTGCG) were grown on synthetic  
521 defined Yeast Nitrogen Base (YNB) agar medium, (YNB; 1.7 g/l Yeast Nitrogen Base  
522 without amino acids and ammonium sulfate (BD Difco), 5 g/l ammonium sulphate, 0.79  
523 g/l Complete Supplement Mixture with all amino acids and nucleotides (Formedium),  
524 20 g/l glucose, 20 g/l agar, succinate buffer i.e. succinic acid 10 g/l and sodium

525 hydroxide 6 g/l), in the presence of 0, 2.5, 5, 7.5, 10, 12.5 or 25  $\mu\text{g}$  ATc /ml. A stock  
526 solution (25 mg/ml in dimethyl sulfoxide; DMSO) was used to achieve the different ATc  
527 concentrations. The final concentration of DMSO in the media was adjusted to 0.1%  
528 (v/v). The pre-cultures for the spot assay were grown in liquid YNB medium for 48 h,  
529 after which 3  $\mu\text{l}$  drops from serial dilutions ( $10^{-1}$ ,  $10^{-2}$ ,  $10^{-3}$ , and  $10^{-4}$ ) of a cell  
530 suspension of  $\text{OD}_{600}$  1 were spotted on solid YNB medium with different  
531 concentrations of ATc and incubated at  $30^{\circ}\text{C}$  for 48 h. We found that 2.5  $\mu\text{g}/\text{ml}$  of the  
532 gRNA inducer ATc was sufficient to elicit growth defects on solid medium for strains  
533 with gRNAs targeting the essential genes *ACT1*, *VPS1* or *SEC21*. The growth of these  
534 strains was incrementally inhibited up to near complete inhibition at 7.5  $\mu\text{g}/\text{ml}$  ATc  
535 (Fig. S9A). In contrast, the growth of the control strains (strains expressing gRNAs  
536 with no genomic target) remained unimpeded even at 25  $\mu\text{g}/\text{ml}$  ATc (Fig. S9A) and we  
537 therefore used 7.5  $\mu\text{g}/\text{ml}$  ATc in our screen of the CRISPRi library.

538 A liquid ATc titration assay was done in 200  $\mu\text{l}$  liquid YNB medium with 0, 0.25, 1, 2,  
539 3, 5, 7.5, 10, 15, or 25  $\mu\text{g}$  ATc /ml in a Bioscreen C MBR device (Fig. S9B). The strains  
540 were pre-cultured in YNB medium for 48 h. A separate pre-culture was used to  
541 inoculate each replicate at a starting  $\text{OD}_{600}$  of approximately 0.1. In order to avoid  
542 uneven oxygen distribution, the plastic cover of the bioscreen plate was replaced with  
543 a sterile sealing membrane permeable to oxygen, carbon dioxide and water vapor  
544 (Breathe-Easy®, Sigma-Aldrich). Strains were grown in continuous shaking for 75 h  
545 during which automated spectrophotometric readings were taken every 20 min. The  
546 raw data was calibrated to actual  $\text{OD}_{600}$  values and smoothed before the growth lag,  
547 generation time, and growth yield were estimated using the PRECOG software (62).  
548 All growth experiments were performed at  $30^{\circ}\text{C}$ .



## 549 **Media preparation for high-throughput phenomics**

550 Solid YPD (10 g/l yeast extract, 20 g/l bacto-peptone, 20 g/l glucose, 20 g/l agar)  
551 medium was used to re-grow the CRISPRi collection from the -80°C storage, and also  
552 to grow the pre-cultures. Growth phenotypes of all the CRISPRi strains in the library  
553 were evaluated in the basal condition i.e. solid YNB medium and in solid YNB  
554 supplemented with 150 mM acetic acid. ATc (7.5 µg/ml, as determined by the  
555 qualitative spot assay) was added to both media to induce gRNA expression. The  
556 acetic acid concentration used was determined by growing a sub-set of the CRISPRi  
557 strains (739 strains), that were pinned to the actual experimental format of 1,536  
558 colonies per plate, on solid medium with different acetic acid concentrations (50, 75,  
559 100, 150 mM). The largest phenotypic difference in growth between the strains was  
560 observed at 150 mM of acetic acid (Fig. S10), and this concentration was selected to  
561 be used in our screen. The final concentration of DMSO in the growth media was  
562 0.03% (v/v) and the pH was adjusted to 4.5.

## 563 **High-throughput phenomics using Scan-o-matic**

564 The high-throughput growth experiments were performed using the Scan-o-matic (20)  
565 phenomics facility at the University of Gothenburg, Sweden. The procedure is  
566 described here in short. A robot Singer ROTOR HDA was used for all replica pinning.  
567 First, the frozen -80°C stock of the CRISPRi library in 24 microtiter plates was pinned  
568 in 384-array format on solid YPD medium and then incubated at 30°C for 72 h in  
569 scanners imaging the plates. For each of the 24 plates, one pre-culture plate was  
570 prepared in 1,536-array format. For this purpose, 384 strains were pinned thrice so  
571 that each has 3 adjacent replicates. In this way 384x3 i.e. 1,152 positions in a 1,536  
572 array was filled. All fourth positions i.e. the rest of the 384 positions were filled with a  
573 spatial control strain to normalize any spatial growth bias (Fig. S11). The Scan-o-matic



574 system uses a dedicated algorithm that can normalize any spatial growth bias in the  
575 extracted phenotypes of the other strains using the growth data of this spatial control  
576 strain (20). Here, the control strain Ctrl\_CC23 was used as the spatial control strain.  
577 The preculture plates were incubated at 30°C for 48 h before being used for the replica  
578 pinning on the experimental plates, that were placed in the scanners in a predefined  
579 orientation and incubated at 30°C. The plates were imaged automatically every 20 min  
580 for 96 h. Subsequently, image analysis by Scan-o-matic was performed and a growth  
581 curve was generated for each colony. Finally, absolute, and spatially normalized  
582 generation times were extracted for all replicates of each strains. The whole  
583 experimental process was repeated twice to generate 6 experimental replicate  
584 measurements for each strain in both the medium with 150 mM acetic acid and in the  
585 basal medium lacking acetic acid.

## 586 **Data analysis**

587 R version 4.0.2 was used to perform all mathematical and statistical analysis. The  
588 analytical steps employed to identify essential or respiratory growth-related genes that  
589 lead to acetic acid sensitivity or tolerance when repressed are described below. Here  
590 we also explain terminologies used.

### 591 *Normalized generation time (LSC GT) and batch correction*

592 The normalized generation time obtained after the spatial bias correction gives the  
593 population doubling time of a strain colony relative to the spatial control strain on a  
594  $\log_2$  scale (20). This is referred to as the log strain coefficient for the generation time  
595 (LSC GT). In previous studies it was found that only few of the gRNAs targeting a  
596 specific gene can induce strong repression that results in a strong phenotypic effect  
597 (8, 12) and therefore most of the strains will display a phenotype similar to that of a

598 control strains. Since we used the control strain Ctrl\_CC23 as the spatial control strain,  
599 it was expected that the median LSC GT of all strains in an experimental plate would  
600 be close to zero. However, some variability in the dataset was still present due to  
601 unavoidable micro-environmental factors between plates and this caused a slight  
602 deviation of the median value of the LSC GT for some experimental plates. To correct  
603 for this batch effect, a plate-wise correction was conducted by subtracting the median  
604 of LSC GT values of all the individual colonies on a plate from the individual LSC GT  
605 values of the colonies growing on that plate. i.e. if strainX is growing on plate Z, the  
606 corrected LSC GT value for strainX was the following:

$$607 \quad \text{LSC\_GT\_Corrected}_{\text{strainX}} = (\text{LSC\_GT}_{\text{strain}}) - \text{Median}(\text{LSC\_GT\_PlateZ})$$

608 *Relative generation time in the presence of acetic acid (LPI GT)*

609 The growth of each CRISPRi strain was evaluated in two different conditions i.e.  
610 medium with 150 mM acetic acid (AA<sub>150 mM</sub>) and basal medium lacking acetic acid  
611 (Basal.condition). The relative performance of a strain in the presence of acetic acid  
612 compared to the basal condition was determined by subtracting the LSC\_GT\_  
613 Basal.condition from the LSC\_GT\_ AA<sub>150 mM</sub>. This relative estimation, which gives the  
614 acetic acid specific effect on the generation time (GT) of a strain, is defined as the log  
615 phenotypic index (LPI GT, (63)), i.e. for strainX the LPI GT was calculated as the  
616 following;

$$617 \quad \text{LPI GT} = (\text{LSC\_GT\_AA}_{150 \text{ mM\_strainX}}) - (\text{LSC\_GT\_Basal.condition}_{\text{strainX}})$$

618 *Statistical tests and P-value adjustment*

619 Since it was expected that most strains would show only minor changes in generation  
620 time, here it is hypothesized that a phenotypic difference between a specific CRISPRi

621 strain to the mean phenotypic performance of all the CRISPRi strains that falls within  
622 the interquartile range (IQR) of the complete dataset (i.e. having a LPI GT value  
623 between -0.024 to 0.075) would be zero, and any difference within the IQR to be just  
624 by chance. Therefore, formally our null hypothesis was the following:

$$625 \quad H_0: \mu_{\text{strainX(All\_replicates\_LPI\_GT)}} - \mu_{\text{(IQR\_LPI\_GT)}} = 0,$$

626 i.e. the difference between LPI GT mean of all replicates of strainX to the mean of the  
627 LPI GT dataset within IQR equals zero. The P-value for each strain in the library was  
628 estimated using Welch's two sample two-sided t-test, which is an adaptation  
629 of Student's t-test and produces fewer false positives (64). Moreover, this method  
630 remains robust for skewed distributions and large sample sizes. In this study, the mean  
631 LPI GT of 3392 strains displayed a significant ( $P\text{-value} \leq 0.1$ ) deviation from  
632  $\mu_{\text{[IQR\_LPI\_GT]}}$  when subjected to Welch's two sample two-sided t-test (Fig. S12A). The  
633 P-values were corrected by the Benjamini-Hochberg method, also known as the false  
634 discovery rate (FDR) method (65). An adjusted-value threshold of  $\leq 0.1$  was set to  
635 select acetic acid tolerant or sensitive strains. Application of the FDR method (65) left  
636 1258 strains below the adjusted P-value threshold of 0.1 (Fig. S12B). None of the  
637 control strains had an adjusted P-value below 0.1 (Fig. S12D).

638 An LPI GT threshold was applied for the selection of tolerant or sensitive strains. If a  
639 CRISPRi strain had an LPI GT\_Mean that was greater than the maximum of the LPI  
640 GT\_Mean of the control strains, then the strain was considered as acetic acid  
641 sensitive. Similarly, if a CRISPRi strain had an LPI GT\_Mean less than the minimum  
642 of the LPI GT\_Mean of the control strains, then the strain was considered as acetic  
643 acid tolerant. In this study, we observed that the range of the LPI GT\_mean for control  
644 strain was between -0.037 and 0.166.

645 Therefore,

646 acetic acid sensitive strain =  $\mu_{\text{strain}}(\text{LPI GT}) > 0.166$  and P.adjusted-value  $\leq 0.1$

647 acetic acid tolerant strain =  $\mu_{\text{strain}}(\text{LPI GT}) < -0.037$  and P.adjusted-value  $\leq 0.1$

648 Some CRISPRi strains that grew well in the basal condition but very poorly or not at  
649 all on the acetic acid experimental plates were identified. These strains were not  
650 subjected to any statistical analysis, but still added to the final list of acetic acid  
651 sensitive CRISPRi strains.

## 652 **Gene ontology (GO) analysis**

653 GO term (process, function, and component) enrichment analysis of the gene lists of  
654 acetic acid tolerant and sensitive strains was performed against a background set of  
655 genes (all 1617 genes targeted in this CRISPRi library) using the GO term finder in  
656 the *Saccharomyces* genome database (Version 0.86)  
657 (<https://www.yeastgenome.org/goTermFinder>) and all GO term hits with p-value  $< 0.1$   
658 were identified.

## 659 **Data access**

660 The R scripts used for analysis and the phenomics data generated in this project are  
661 available from  
662 [https://github.com/mukherjeevaskar267/CRISPRi\\_Screening\\_AceticAcid](https://github.com/mukherjeevaskar267/CRISPRi_Screening_AceticAcid). The raw  
663 image files of the Scan-o-matic projects can be requested for reanalysis from the  
664 authors.

## 665 **Growth of selected strains in liquid media**

666 In order to validate the acetic acid sensitivity or tolerance observed for the CRISPRi  
667 strains in the Scan-o-matic screening, selected strains were grown in liquid YNB  
668 medium using the Bioscreen platform. The 48 most acetic acid sensitive and 50 most  
669 tolerant CRISPRi strains from the Scan-o-matic analysis were selected for the  
670 validation. Moreover, all CRISPRi strains with gRNAs targeting any of the following  
671 12 genes: *RPT4*, *RPN9*, *PRE4*, *MRPL10*, *MRPL4*, *SEC27*, *MIA40*, *VPS45*, *PUP3*,  
672 *VMA3*, *SEC62*, *COG1*, were included making a total of 176 strains that were grown  
673 together with 7 control strains in liquid medium (raw data available in Table S5).

674 Briefly, the strains were pinned from the frozen stock into liquid YNB medium and  
675 grown at 30°C for 40 h at 220 rpm. This plate was used as the preculture and separate  
676 precultures were prepared for each independent culture. The strains were grown in  
677 liquid YNB medium (basal condition) and in liquid YNB medium supplemented with  
678 125 or 150 mM of acetic acid. For each strain, 3 independent replicates were included  
679 for each growth condition. Two µg/ml ATc was added to the media to induce gRNA  
680 expression. The final concentration of DMSO in the growth media was 0.008% (v/v)  
681 and the pH was adjusted to 4.5. The experimental method and subsequent phenotype  
682 extraction were the same as for the ATc titration experiment, except that the strains  
683 were grown for 96 h. Similar to Scan-o-matic, all downstream analysis was performed  
684 using R version 4.0.2.

## 685 **Expression analysis by qPCR**

### 686 *Strains*

687 Expression analysis by qPCR was performed to detect mRNA expression of *RPN9*,  
688 *RPT4*, *GLC7* and *YPI1*. For each target gene, 5 strains (i.e. each with a different

689 gRNA) that showed different degree of acetic acid tolerance/sensitivity in Scan-o-matic  
690 screening were selected. Three control strains (CC2, CC23, CC32) were included to  
691 estimate the expression of the target genes in the absence of CRISPR interference.

#### 692 *RNA preparation and cDNA synthesis*

693 Cells were grown to mid-exponential phase in liquid YNB (basal condition) or YNB  
694 medium supplemented with 125 mM acetic acid, in the Bioscreen platform and  
695 collected by centrifugation at 2000xg, at 4°C for 3 min. The cell pellet was immediately  
696 frozen in liquid nitrogen. For each CRISPRi strain, 2 independent replicates and for  
697 each control strain 3 independent replicates were included. For RNA preparation, the  
698 pellet was dissolved in 600 µl lysis buffer (PureLink™ RNA minikit, Invitrogen) after  
699 which the cell-suspension was transferred into tubes containing 0.5 mm glass beads.  
700 Cells were lysed by shaking for 40 s at 6 m/s in a MP Biomedical FastPrep and then  
701 collected by centrifugation in a microcentrifuge for 2 min at 4 °C, at full speed. 370 µl  
702 of 70% ethanol was added to the resulting supernatant and total RNA was prepared  
703 using the PureLink™ RNA minikit (Invitrogen). The obtained RNA was treated by  
704 DNase (TURBO DNA-free™ Kit, Invitrogen) and cDNA synthesis was performed on  
705 900 ng DNased RNA using the iScript™ cDNA Synthesis Kit (Bio-Rad).

#### 706 *Measurement of gene expression*

707 qPCR was performed using 2.5 ng cDNA and the iTaq™ Universal SYBR® Green  
708 Supermix (Bio-Rad) for detection. The expression of the target genes was normalized  
709 against the geometric mean of the reference genes *ACT1* and *IPP1*. Primer  
710 efficiencies were between 96 and 102% as determined by using different amounts of  
711 cDNA. For primer sequences see Table S6. The qPCR protocol was as follows: an  
712 initial denaturation at 95°C for 3 min, denaturation at 95°C for 20s, annealing at 60 °C

713 for 20 s and elongation at 72°C for 30 s. In total 40 PCR cycles were run. For statistical  
714 analysis, an F-test was performed to determine the variance between all the replicates  
715 of the control strains and the replicates of a CRISPRi strain. Depending on this result,  
716 a two sample two tailed t-test assuming equal or unequal variance was performed for  
717 each strain and for a particular condition, where the null hypothesis was:

718 
$$H_0: \mu_{2^{\Delta Ct}}(\text{control}) - \mu_{2^{\Delta Ct}}(\text{CRISPRi strain}) = 0.$$

## 719 **ACKNOWLEDGMENTS**

720 The Novo Nordisk Foundation (Grant number NF19OC0057685), The Royal Swedish  
721 Academy of Sciences and Chalmers Area of Advance Energy are acknowledged for  
722 financial support.

## 723 **AUTHOR CONTRIBUTIONS**

724 Y.N. and A.B. conceptualized the project; Y.N, A.B. and V.M. designed the  
725 experimental and computational analysis; V.M. and U.L. performed the experiments;  
726 V.M. performed computational analysis; V.M., Y.N., A.B., and R.P.S. interpreted the  
727 results; V.M. and Y.N. wrote the initial draft paper; all authors revised the initial draft  
728 and wrote the final paper.

## 729 **DECLARATION OF INTERESTS**

730 R.P.S is a cofounder of Recombia Biosciences which engineers yeast to improve  
731 industrial fermentation processes.

## 732 **REFERENCES**

- 733 1. Winzeler EA, Shoemaker DD, Astromoff A, Liang H, Anderson K, Andre B, Bangham R,  
734 Benito R, Boeke JD, Bussey H. 1999. Functional characterization of the *S. cerevisiae*  
735 genome by gene deletion and parallel analysis. *Science* 285:901-906.
- 736 2. Huh WK, Falvo JV, Gerke LC, Carroll AS, Howson RW, Weissman JS, O'Shea EK. 2003.  
737 Global analysis of protein localization in budding yeast. *Nature* 425:686-91.
- 738 3. Mnaimneh S, Davierwala AP, Haynes J, Moffat J, Peng WT, Zhang W, Yang X,  
739 Pootoolal J, Chua G, Lopez A, Trochesset M, Morse D, Krogan NJ, Hiley SL, Li Z, Morris  
740 Q, Grigull J, Mitsakakis N, Roberts CJ, Greenblatt JF, Boone C, Kaiser CA, Andrews BJ,  
741 Hughes TR. 2004. Exploration of essential gene functions via titratable promoter  
742 alleles. *Cell* 118:31-44.
- 743 4. Sopko R, Huang D, Preston N, Chua G, Papp B, Kafadar K, Snyder M, Oliver SG, Cyert  
744 M, Hughes TR, Boone C, Andrews B. 2006. Mapping pathways and phenotypes by  
745 systematic gene overexpression. *Mol Cell* 21:319-30.
- 746 5. Garfield DA, Wray GA. 2010. The Evolution of Gene Regulatory Interactions.  
747 *BioScience* 60:15-23.
- 748 6. Xu X, Qi LS. 2019. A CRISPR–dCas Toolbox for Genetic Engineering and Synthetic  
749 Biology. *Journal of Molecular Biology* 431:34-47.
- 750 7. Qi LS, Larson MH, Gilbert LA, Doudna JA, Weissman JS, Arkin AP, Lim WA. 2013.  
751 Repurposing CRISPR as an RNA-guided platform for sequence-specific control of  
752 gene expression. *Cell* 152:1173-1183.
- 753 8. Smith JD, Suresh S, Schlecht U, Wu M, Wagih O, Peltz G, Davis RW, Steinmetz LM,  
754 Parts L, Onge RPS. 2016. Quantitative CRISPR interference screens in yeast identify  
755 chemical-genetic interactions and new rules for guide RNA design. *Genome biology*  
756 17:45.



- 757 9. Momen-Roknabadi A, Oikonomou P, Zegans M, Tavazoie S. 2020. An inducible  
758 CRISPR interference library for genetic interrogation of *Saccharomyces cerevisiae*  
759 biology. *Communications Biology* 3:723.
- 760 10. Jaffe M, Dziulko A, Smith JD, Onge RPS, Levy SF, Sherlock G. 2019. Improved  
761 discovery of genetic interactions using CRISPRiSeq across multiple environments.  
762 *Genome research* 29:668-681.
- 763 11. Lian J, Schultz C, Cao M, Hamedirad M, Zhao H. 2019. Multi-functional genome-wide  
764 CRISPR system for high throughput genotype–phenotype mapping. *Nature*  
765 *Communications* 10:5794.
- 766 12. Smith JD, Schlecht U, Xu W, Suresh S, Horecka J, Proctor MJ, Aiyar RS, Bennett RAO,  
767 Chu A, Li YF, Roy K, Davis RW, Steinmetz LM, Hyman RW, Levy SF, St. Onge RP. 2017.  
768 A method for high-throughput production of sequence-verified DNA libraries and  
769 strain collections. *Molecular Systems Biology* 13:913.
- 770 13. Gutmann F, Jann C, Pereira F, Johansson A, Steinmetz LM, Patil KR. 2021. CRISPRi  
771 screens reveal genes modulating yeast growth in lignocellulose hydrolysate.  
772 *Biotechnology for Biofuels* 14:41.
- 773 14. Gilbert LA, Larson MH, Morsut L, Liu Z, Brar GA, Torres SE, Stern-Ginossar N,  
774 Brandman O, Whitehead EH, Doudna JA. 2013. CRISPR-mediated modular RNA-  
775 guided regulation of transcription in eukaryotes. *Cell* 154:442-451.
- 776 15. Lian J, Hamedirad M, Hu S, Zhao H. 2017. Combinatorial metabolic engineering using  
777 an orthogonal tri-functional CRISPR system. *Nature Communications* 8:1688.
- 778 16. Tang MC, Fischer CR, Chari JV, Tan D, Suresh S, Chu A, Miranda M, Smith J, Zhang Z,  
779 Garg NK, St Onge RP, Tang Y. 2019. Thioesterase-Catalyzed Aminoacylation and  
780 Thiolation of Polyketides in Fungi. *J Am Chem Soc* 141:8198-8206.

- 781 17. Jönsson LJ, Martín C. 2016. Pretreatment of lignocellulose: Formation of inhibitory  
782 by-products and strategies for minimizing their effects. *Bioresource Technology*  
783 199:103-112.
- 784 18. Fernández-Niño M, Pulido S, Stefanoska D, Pérez C, González-Ramos D, van Maris  
785 AJA, Marchal K, Nevoigt E, Swinnen S. 2018. Identification of novel genes involved in  
786 acetic acid tolerance of *Saccharomyces cerevisiae* using pooled-segregant RNA  
787 sequencing. *FEMS Yeast Research* 18.
- 788 19. Ko JK, Enkh-Amgalan T, Gong G, Um Y, Lee S-M. 2020. Improved bioconversion of  
789 lignocellulosic biomass by *Saccharomyces cerevisiae* engineered for tolerance to  
790 acetic acid. *GCB Bioenergy* 12:90-100.
- 791 20. Zackrisson M, Hallin J, Ottosson L-G, Dahl P, Fernandez-Parada E, Ländström E,  
792 Fernandez-Ricaud L, Kaferle P, Skyman A, Stenberg S, Omholt S, Petrovič U,  
793 Warringer J, Blomberg A. 2016. Scan-o-matic: High-Resolution Microbial Phenomics  
794 at a Massive Scale. *G3: Genes|Genomes|Genetics* 6:3003-3014.
- 795 21. Pereira FB, Teixeira MC, Mira NP, Sá-Correia I, Domingues L. 2014. Genome-wide  
796 screening of *Saccharomyces cerevisiae* genes required to foster tolerance towards  
797 industrial wheat straw hydrolysates. *Journal of Industrial Microbiology &*  
798 *Biotechnology* 41:1753-1761.
- 799 22. Sousa M, Duarte AM, Fernandes TR, Chaves SR, Pacheco A, Leão C, Côrte-Real M,  
800 Sousa MJ. 2013. Genome-wide identification of genes involved in the positive and  
801 negative regulation of acetic acid-induced programmed cell death in *Saccharomyces*  
802 *cerevisiae*. *BMC Genomics* 14:838.
- 803 23. Guo Z-p, Olsson L. 2016. Physiological responses to acid stress by *Saccharomyces*  
804 *cerevisiae* when applying high initial cell density. *FEMS yeast research* 16.

- 805 24. Kitanovic A, Bonowski F, Heigwer F, Ruoff P, Kitanovic I, Ungewiss C, Wölfl S. 2012.  
806 Acetic acid treatment in *S. cerevisiae* creates significant energy deficiency and  
807 nutrient starvation that is dependent on the activity of the mitochondrial  
808 transcriptional complex Hap2-3-4-5. *Frontiers in oncology* 2:118.
- 809 25. Cannon JF, Pringle JR, Fiechter A, Khalil M. 1994. Characterization of glycogen-  
810 deficient *glc* mutants of *Saccharomyces cerevisiae*. *Genetics* 136:485-503.
- 811 26. Franzosa EA, Albanèse V, Frydman J, Xia Y, McClellan AJ. 2011. Heterozygous yeast  
812 deletion collection screens reveal essential targets of Hsp90. *PLoS One* 6:e28211.
- 813 27. Okada N, Ogawa J, Shima J. 2014. Comprehensive analysis of genes involved in the  
814 oxidative stress tolerance using yeast heterozygous deletion collection. *FEMS yeast*  
815 *research* 14:425-434.
- 816 28. Li Z, Vizeacoumar FJ, Bahr S, Li J, Warringer J, Vizeacoumar FS, Min R, VanderSluis B,  
817 Bellay J, DeVit M. 2011. Systematic exploration of essential yeast gene function with  
818 temperature-sensitive mutants. *Nature biotechnology* 29:361-367.
- 819 29. Lee AY, St Onge RP, Proctor MJ, Wallace IM, Nile AH, Spagnuolo PA, Jitkova Y,  
820 Gronda M, Wu Y, Kim MK, Cheung-Ong K, Torres NP, Spear ED, Han MK, Schlecht U,  
821 Suresh S, Duby G, Heisler LE, Surendra A, Fung E, Urbanus ML, Gebbia M, Lissina E,  
822 Miranda M, Chiang JH, Aparicio AM, Zeghouf M, Davis RW, Cherfils J, Boutry M,  
823 Kaiser CA, Cummins CL, Trimble WS, Brown GW, Schimmer AD, Bankaitis VA, Nislow  
824 C, Bader GD, Giaever G. 2014. Mapping the cellular response to small molecules  
825 using chemogenomic fitness signatures. *Science* 344:208-11.
- 826 30. Giaever G, Shoemaker DD, Jones TW, Liang H, Winzeler EA, Astromoff A, Davis RW.  
827 1999. Genomic profiling of drug sensitivities via induced haploinsufficiency. *Nat*  
828 *Genet* 21:278-83.

- 829 31. Ben-Aroya S, Coombes C, Kwok T, O'Donnell KA, Boeke JD, Hieter P. 2008. Toward a  
830 comprehensive temperature-sensitive mutant repository of the essential genes of  
831 *Saccharomyces cerevisiae*. *Molecular cell* 30:248-258.
- 832 32. Vermeersch L, Perez-Samper G, Cerulus B, Jariani A, Gallone B, Voordeckers K,  
833 Steensels J, Verstrepen KJ. 2019. On the duration of the microbial lag phase. *Current*  
834 *Genetics* 65:721-727.
- 835 33. Thatcher J, Shaw JM, Dickinson W. 1998. Marginal fitness contributions of  
836 nonessential genes in yeast. *Proceedings of the National Academy of Sciences*  
837 95:253-257.
- 838 34. Wagner A. 2000. The role of population size, pleiotropy and fitness effects of  
839 mutations in the evolution of overlapping gene functions. *Genetics* 154:1389-1401.
- 840 35. Nygård Y, Mojzita D, Toivari M, Penttilä M, Wiebe MG, Ruohonen L. 2014. The  
841 diverse role of Pdr12 in resistance to weak organic acids. *Yeast* 31:219-232.
- 842 36. Mira NP, Palma M, Guerreiro JF, Sá-Correia I. 2010. Genome-wide identification of  
843 *Saccharomyces cerevisiae* genes required for tolerance to acetic acid. *Microbial Cell*  
844 *Factories* 9:79.
- 845 37. Pereira C, Bessa C, Saraiva L. 2012. Endocytosis inhibition during H<sub>2</sub>O<sub>2</sub>-induced  
846 apoptosis in yeast. *FEMS Yeast Research* 12:755-760.
- 847 38. Szul T, Sztul E. 2011. COPII and COPI Traffic at the ER-Golgi Interface. *Physiology*  
848 26:348-364.
- 849 39. Han J, Pluhackova K, Böckmann RA. 2017. The Multifaceted Role of SNARE Proteins  
850 in Membrane Fusion. *Frontiers in physiology* 8:5-5.

- 851 40. Kawazoe N, Kimata Y, Izawa S. 2017. Acetic Acid Causes Endoplasmic Reticulum  
852 Stress and Induces the Unfolded Protein Response in *Saccharomyces cerevisiae*.  
853 *Frontiers in microbiology* 8:1192-1192.
- 854 41. Hillenmeyer ME, Fung E, Wildenhain J, Pierce SE, Hoon S, Lee W, Proctor M, St.Onge  
855 RP, Tyers M, Koller D, Altman RB, Davis RW, Nislow C, Giaever G. 2008. The Chemical  
856 Genomic Portrait of Yeast: Uncovering a Phenotype for All Genes. *Science* 320:362-  
857 365.
- 858 42. Palma M, Guerreiro JF, Sá-Correia I. 2018. Adaptive Response and Tolerance to  
859 Acetic Acid in *Saccharomyces cerevisiae* and *Zygosaccharomyces bailii*: A  
860 Physiological Genomics Perspective. *Frontiers in Microbiology* 9.
- 861 43. Schauer A, Knauer H, Ruckenstuhl C, Fussi H, Durchschlag M, Potocnik U, Fröhlich K-  
862 U. 2009. Vacuolar functions determine the mode of cell death. *Biochimica et*  
863 *Biophysica Acta (BBA)-Molecular Cell Research* 1793:540-545.
- 864 44. Lillie SH, Pringle JR. 1980. Reserve carbohydrate metabolism in *Saccharomyces*  
865 *cerevisiae*: responses to nutrient limitation. *Journal of bacteriology* 143:1384-1394.
- 866 45. Hueso G, Aparicio-Sanchis R, Montesinos C, Lorenz S, Murguía JR, Serrano R. 2012. A  
867 novel role for protein kinase Gcn2 in yeast tolerance to intracellular acid stress.  
868 *Biochemical Journal* 441:255-264.
- 869 46. García-Gimeno MA, Muñoz I, Ariño J, Sanz P. 2003. Molecular characterization of  
870 Ypi1, a novel *Saccharomyces cerevisiae* type 1 protein phosphatase inhibitor. *J Biol*  
871 *Chem* 278:47744-52.
- 872 47. Bharucha JP, Larson JR, Gao L, Daves LK, Tatchell K. 2008. Ypi1, a positive regulator of  
873 nuclear protein phosphatase type 1 activity in *Saccharomyces cerevisiae*. *Molecular*  
874 *biology of the cell* 19:1032-1045.

- 875 48. Raynes R, Pomatto LCD, Davies KJA. 2016. Degradation of oxidized proteins by the  
876 proteasome: Distinguishing between the 20S, 26S, and immunoproteasome  
877 proteolytic pathways. *Molecular aspects of medicine* 50:41-55.
- 878 49. Guaragnella N, Antonacci L, Passarella S, Marra E, Giannattasio S. 2011.  
879 Achievements and perspectives in yeast acetic acid-induced programmed cell death  
880 pathways. *Biochem Soc Trans* 39:1538-43.
- 881 50. Colussi C, Albertini MC, Coppola S, Rovidati S, Galli F, Ghibelli L. 2000. H<sub>2</sub>O<sub>2</sub>-induced  
882 block of glycolysis as an active ADP-ribosylation reaction protecting cells from  
883 apoptosis. *The FASEB Journal* 14:2266-2276.
- 884 51. Reichmann D, Voth W, Jakob U. 2018. Maintaining a healthy proteome during  
885 oxidative stress. *Molecular cell* 69:203-213.
- 886 52. Dahl J-U, Gray MJ, Jakob U. 2015. Protein quality control under oxidative stress  
887 conditions. *Journal of Molecular Biology* 427:1549-1563.
- 888 53. Dal Vechio FH, Cerqueira F, Augusto O, Lopes R, Demasi M. 2014. Peptides that  
889 activate the 20S proteasome by gate opening increased oxidized protein removal  
890 and reduced protein aggregation. *Free Radical Biology and Medicine* 67:304-313.
- 891 54. Höhn A, Jung T, Grune T. 2014. Pathophysiological importance of aggregated  
892 damaged proteins. *Free Radical Biology and Medicine* 71:70-89.
- 893 55. Jung T, Grune T. 2008. The proteasome and its role in the degradation of oxidized  
894 proteins. *IUBMB life* 60:743-752.
- 895 56. Davies KJ. 2001. Degradation of oxidized proteins by the 20S proteasome. *Biochimie*  
896 83:301-310.

- 897 57. Reinheckel T, Ullrich O, Sitte N, Grune T. 2000. Differential impairment of 20S and  
898 26S proteasome activities in human hematopoietic K562 cells during oxidative stress.  
899 Archives of biochemistry and biophysics 377:65-68.
- 900 58. Inai Y, Nishikimi M. 2002. Increased degradation of oxidized proteins in yeast  
901 defective in 26 S proteasome assembly. Archives of biochemistry and biophysics  
902 404:279-284.
- 903 59. Karpov DS, Spasskaya DS, Nadolinskaia NI, Tutyaeva VV, Lysov YP, Karpov VL. 2019.  
904 Deregulation of the 19S proteasome complex increases yeast resistance to 4-NQO  
905 and oxidative stress via upregulation of Rpn4- and proteasome-dependent stress  
906 responsive genes. FEMS Yeast Research 19.
- 907 60. Schlecht U, Suresh S, Xu W, Aparicio AM, Chu A, Proctor MJ, Davis RW, Scharfe C, St  
908 Onge RP. 2014. A functional screen for copper homeostasis genes identifies a  
909 pharmacologically tractable cellular system. BMC genomics 15:263.
- 910 61. Steinmetz LM, Scharfe C, Deutschbauer AM, Mokranjac D, Herman ZS, Jones T, Chu  
911 AM, Giaever G, Prokisch H, Oefner PJ. 2002. Systematic screen for human disease  
912 genes in yeast. Nature genetics 31:400-404.
- 913 62. Fernandez-Ricaud L, Kourtchenko O, Zackrisson M, Warringer J, Blomberg A. 2016.  
914 PRECOG: a tool for automated extraction and visualization of fitness components in  
915 microbial growth phenomics. BMC Bioinformatics 17:249.
- 916 63. Warringer J, Ericson E, Fernandez L, Nerman O, Blomberg A. 2003. High-resolution  
917 yeast phenomics resolves different physiological features in the saline response.  
918 Proceedings of the national academy of sciences 100:15724-15729.
- 919 64. Welch BL. 1947. The generalization of student's' problem when several different  
920 population variances are involved. Biometrika 34:28-35.

- 921 65. Benjamini Y, Hochberg Y. 1995. Controlling the false discovery rate: a practical and  
 922 powerful approach to multiple testing. Journal of the Royal statistical society: series  
 923 B (Methodological) 57:289-300.
- 924 66. Luan B, Huang X, Wu J, Mei Z, Wang Y, Xue X, Yan C, Wang J, Finley DJ, Shi Y, Wang F.  
 925 2016. Structure of an endogenous yeast 26S proteasome reveals two major  
 926 conformational states. Proc Natl Acad Sci U S A 113:2642-7.

927

928 **TABLES**

929 Table 1: CRISPRi targeting of genes related to vesicle, organelle or vesicle transport  
 930 induced acetic acid sensitivity.

| Gene                                          | Gene description                              | Nr. of gRNAs | Change in generation time   |
|-----------------------------------------------|-----------------------------------------------|--------------|-----------------------------|
| Genes encoding COPI and COPII vesicle coating |                                               |              |                             |
| <i>SEC27</i>                                  | beta' subunit of COPI vesicle coat            | 5            | +19 to +140%                |
| <i>SEC21</i>                                  | gamma subunit of COPI vesicle coat            | 3            | +57% to complete inhibition |
| <i>RET3</i>                                   | zeta subunit of COPI vesicle coat             | 3            | +21 to +30%                 |
| <i>SAR1</i>                                   | Regulation of COPII vesicle coating formation | 3            | +36 to +191%                |
| <i>SEC23</i>                                  | Regulation of COPII vesicle coating formation | 3            | +31 to +50%                 |
| <i>SEC24</i>                                  | COPII vesicle cargo loading                   | 2            | +27 or +72%                 |
| <i>SEC13</i>                                  | Facilitation of COPII vesicle budding         | 2            | +25 or +119%                |
| <i>SEC12</i>                                  | Regulation of COPII vesicle coating formation | 1            | +19%                        |
| <i>SEC31</i>                                  | Facilitation of COPII vesicle budding         | 1            | +35%                        |
| <i>YPT1</i>                                   | Facilitation of COPII vesicle budding         | 1            | +39%                        |



| Genes encoding SNARE proteins                                                     |                                                                                                           |   |                             |
|-----------------------------------------------------------------------------------|-----------------------------------------------------------------------------------------------------------|---|-----------------------------|
| <i>YKT6</i>                                                                       | v-SNARE protein                                                                                           | 2 | +22 or +76%                 |
| <i>BET1</i>                                                                       | v-SNARE protein                                                                                           | 1 | Complete inhibition         |
| <i>BOS1</i>                                                                       | v-SNARE protein                                                                                           | 1 | +18%                        |
| <i>TLG1</i>                                                                       | t-SNARE protein                                                                                           | 2 | +17% or +45%                |
| <i>SED5</i>                                                                       | t-SNARE protein                                                                                           | 2 | +30% or +197%               |
| <i>SEC17</i>                                                                      | involved in SNARE complex disassembly                                                                     | 1 | +29%                        |
| <i>SEC22</i>                                                                      | R-SNARE protein, assembles into SNARE complex with Bet1p, Bos1p and Sed5p                                 | 1 | +15%                        |
| Vacuolar membrane ATPase complex proteins / GTPases required for vacuolar sorting |                                                                                                           |   |                             |
| <i>VPS45*</i>                                                                     | Essential for vacuolar protein sorting and also involved in positive regulation of SNARE complex assembly | 3 | +32% to +206%               |
| <i>VMA3</i>                                                                       | Proteolipid subunit c of the V0 domain of vacuolar H(+)-ATPase                                            | 2 | +19% to +41%                |
| <i>VMA7</i>                                                                       | Subunit F of the V1 peripheral membrane domain of V-ATPase                                                | 1 | +50%                        |
| <i>VMA11</i>                                                                      | Vacuolar ATPase V0 domain subunit c                                                                       | 1 | +18%                        |
| <i>VPS1</i>                                                                       | GTPase required for vacuolar sorting                                                                      | 2 | +71% to Complete inhibition |
| <i>VPS4</i>                                                                       | AAA-ATPase involved in multivesicular body (MVB) protein sorting                                          | 1 | +21%                        |
| <i>VPS36</i>                                                                      | Involved in ubiquitin-dependent sorting of proteins into the endosome                                     | 1 | +50%                        |
| <i>VPS53</i>                                                                      | Required for vacuolar protein sorting                                                                     | 1 | +48%                        |

932 Table 2: CRISPRi targeting of genes encoding proteins of the 19S proteasomal  
 933 regulatory particle lid and the base subcomplex induced acetic acid tolerance.

| <b>Gene</b>                                             | <b>Gene description</b>                                                                         | <b>Nr. of gRNAs</b> | <b>Change in generation time</b> |
|---------------------------------------------------------|-------------------------------------------------------------------------------------------------|---------------------|----------------------------------|
| <b>Proteasome 19S Regulatory particles LID complex</b>  |                                                                                                 |                     |                                  |
| <i>RPN9</i>                                             | Non-ATPase regulatory subunit of the 26S proteasome lid                                         | 5                   | -5% to -27%                      |
| <i>RPN6</i>                                             | non-ATPase regulatory subunit of the 26S proteasome lid; required for the assembly and activity | 3                   | -4% to -8%                       |
| <i>RPN5</i>                                             | non-ATPase regulatory subunit of the 26S proteasome lid                                         | 2                   | -2% or -6%                       |
| <i>RPN3</i>                                             | non-ATPase regulatory subunit of the 26S proteasome lid                                         | 1                   | -3%                              |
| <i>RPN8</i>                                             | non-ATPase regulatory subunit of the 26S proteasome lid                                         | 1                   | -15%                             |
| <i>RPN12</i>                                            | non-ATPase regulatory subunit of the 26S proteasome lid                                         | 1                   | -14%                             |
| <b>Proteasome 19S Regulatory particles BASE complex</b> |                                                                                                 |                     |                                  |
| <i>RPT1</i>                                             | ATPase of the 19S regulatory particle                                                           | 3                   | -5% to -12%                      |
| <i>RPT4</i>                                             | ATPase of the 19S regulatory particle                                                           | 2                   | -11% to -16%                     |
| <i>RPT5</i>                                             | ATPase of the 19S regulatory particle                                                           | 2                   | -3% to -4%                       |
| <i>RPT6</i>                                             | ATPase of the 19S regulatory particle                                                           | 2                   | -6% to -7%                       |
| <i>RPT2</i>                                             | ATPase of the 19S regulatory particle                                                           | 1                   | -11%                             |
| <b>Proteasome 20S Core particle</b>                     |                                                                                                 |                     |                                  |
| <i>SCL1</i>                                             | Alpha 1 subunit of the 20S proteasome                                                           | 1                   | +74%                             |

|             |                                       |   |              |
|-------------|---------------------------------------|---|--------------|
| <i>PRE5</i> | Alpha 6 subunit of the 20S proteasome | 1 | +15%         |
| <i>PRE4</i> | Beta 7 subunit of the 20S proteasome  | 1 | +31%         |
| <i>PUP3</i> | Beta 3 subunit of the 20S proteasome  | 2 | +30% to +63% |

934

## 935 **FIGURE LEGENDS**

936 Fig. 1. A constitutively expressed *dCas9-Mxi1* and the tetracycline-regulatable gRNA  
937 expression system induces transcription repression of essential or respiratory growth-  
938 essential genes. Each strain in the library was phenotyped individually for growth on  
939 solid medium with 150 mM acetic acid or in basal medium lacking acetic acid, using  
940 the Scan-o-matic platform.

941

942 Fig. 2. The CRISPRi strains showed minor phenotypic variation in basal condition and  
943 large phenotypic variation under acetic acid stress.

944 A: Scatterplot displaying the reproducibility of the two Scan-o-matic screenings. The  
945 mean of the three LPI GT replicates of each strain is plotted, control strains in green,  
946 acetic acid sensitive strains in red, acetic acid tolerant strains in blue and remaining  
947 strains in black. The linear regression for the data of all strains is displayed with a  
948 black line and for the acetic acid sensitive and tolerant strains with a red line.

949 B: Histogram of the normalized generation time of each CRISPRi strain in basal  
950 condition (grey) and at 150 mM of acetic acid (magenta). Strains outside the two red  
951 dashed lines, have generation times that are 10% shorter or 10% longer than the  
952 control strain.

953 C: Scatterplot showing the normalized generation time of each CRISPRi strains in  
954 basal condition and relative generation time in medium with 150 mM acetic acid. Each  
955 point indicates the mean of all the replicates (n=6, when some of the replicates failed  
956 to grow, n=3-6). The data of the CRISPRi control strains is indicated green, of acetic  
957 acid sensitive in red, of acetic acid tolerant in blue and all other strains in black. The  
958 LPI GT threshold is indicated with a gray dashed line. Inset: the violin-plots display the  
959 spread and the distribution of the LPI GT data for all CRISPRi strains (ALL), and LPI  
960 GT values of CRISPRi control strains (Control).

961 D: Overview of number of strains and genes identified as acetic acid tolerant or  
962 sensitive.

963

964 Fig. 3. Scatterplot of the relative performance of the strains in liquid medium with 125  
965 mM of acetic acid and in solid medium with 150 mM acetic acid (Scan-o-matic  
966 screening). The linear regression of the data is displayed with a black line. The mean  
967 of the three LPI GT replicates of each strain is plotted, control strains in green, acetic  
968 acid sensitive strains in red, acetic acid tolerant strains in blue and remaining strains  
969 in black. The names of the genes repressed in the tolerant or sensitive strains are  
970 indicated in the plot.

971

972 Fig. 4. Percentage change in expression compared to the control strain of target genes  
973 at 125 mM of acetic acid in liquid medium in relation to percentage change in relative  
974 growth of selected CRISPRi strains compared to the control strain in solid medium  
975 with 150 mM of acetic acid. The gRNA of the strains targeted *RPN9* (A), *RPT4* (B),

976 *GLC7* (C) or *YPI1* (D). The individual points on the plot represent different gRNAs  
977 targeting the same gene. The expression of the target gene was normalized against  
978 the geometric mean of the reference genes *ACT1* and *IPP1*. See Fig. S4 for qPCR  
979 data.

980

981 Fig. 5. Functional and gene ontology enrichment analysis of genes repressed in acetic  
982 acid sensitive and tolerant CRISPRi strains. GO terms connected to biological  
983 process, genetic functions and cell components are indicated using yellow, black, and  
984 green colored bars, respectively. The negative log<sub>10</sub>-transformed Bonferroni-  
985 corrected P-value (Kruskal–Wallis test) is plotted on the X-axis. Enrichment factors  
986 (ratio of the observed frequency to the frequency expected by chance) for each GO  
987 term are displayed on the top of each bar.

988

989 Fig. 6. CRISPRi repression of genes encoding subunits of 26S proteasomal complex  
990 induced acetic acid tolerance (mainly genes encoding proteins of the 19S proteasomal  
991 regulatory particle lid and the base subcomplex, displayed with blue circles) or  
992 sensitivity (genes of the 20S core particle, displayed with red circles). The color in each  
993 subunit display only the most dominant phenotype (i.e. significant and highest in effect  
994 size) obtained by CRISPRi repression of the gene encoding that subunit. Subunits  
995 encoded by genes not included in the strain collection are displayed in grey and  
996 subunits for which CRISPRi repression with multiple gRNAs induced the dominant  
997 phenotype are indicated with an asterisk. The schematic representation of the relative  
998 positions of the subunits in the proteasome complex are inferred from the Cryo-EM  
999 structure reported by Luan et al. (66).

1000

1001 Fig. 7. A: Relative growth in liquid medium of CRISPRi strains with gRNAs targeting  
1002 genes encoding proteasomal subunits (20S CP; core particle, 19S lid or 19S base)  
1003 and the control strains. The relative generation time of all strains (A) and biomass yield  
1004 (B), and lag phase (C) of the acetic acid tolerant strains is shown.

1005

1006 Fig. 8. Overview of the response of the cells towards acetic acid stress based on  
1007 CRISPRi targeting of essential genes. The cells are starved of ATP due to ATP  
1008 expensive processes such as the elevated action of H<sup>+</sup>-ATPase and V-ATPase  
1009 pumps. Therefore, we hypothesize that the downregulation of subunits of 19S RP  
1010 increases the abundance of 20S CP, which offers the cell an alternative to the ATP  
1011 expensive 26S proteasome mediated protein degradation. This in turn gives yeast a  
1012 fitness benefit under oxidative stress induced by acetic acid. ROS = reactive oxygen

# CRISPRi library

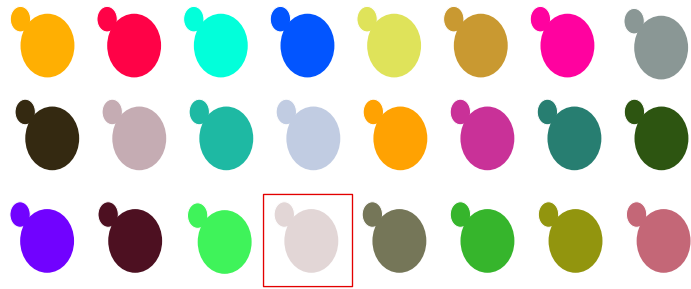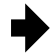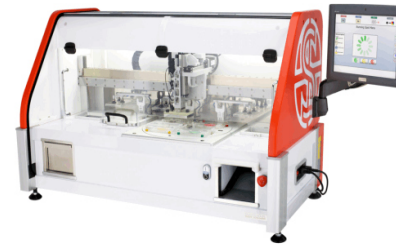

Pinning strains on solid medium using Singer HDA rotor

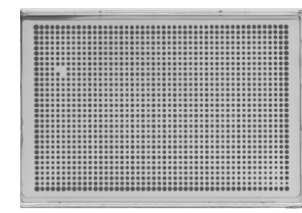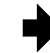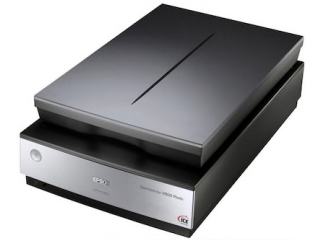

Automatic scanning every 20 minutes

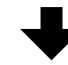

## Integrated Data Analysis

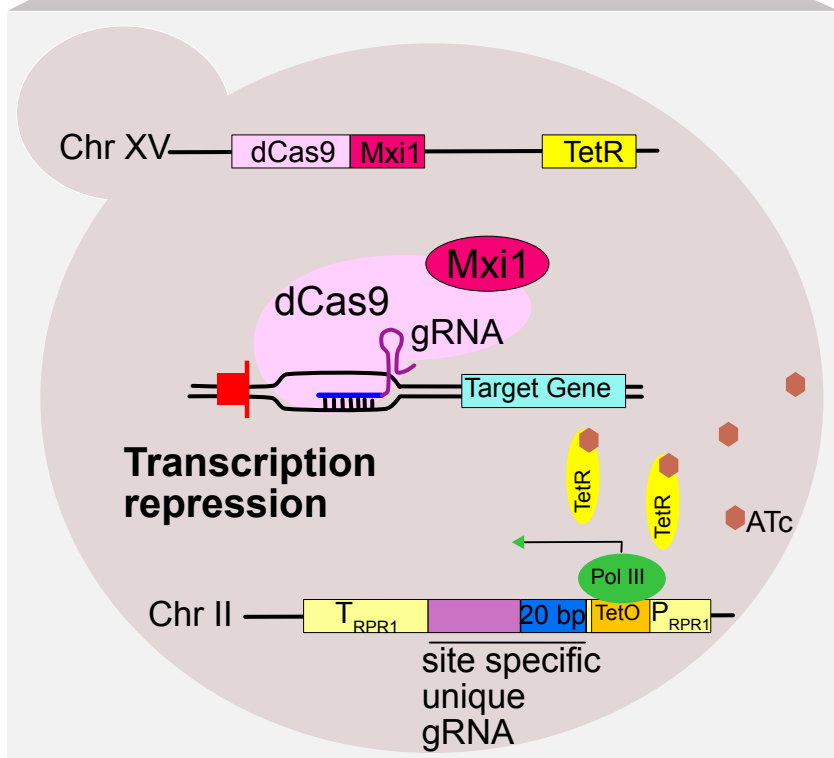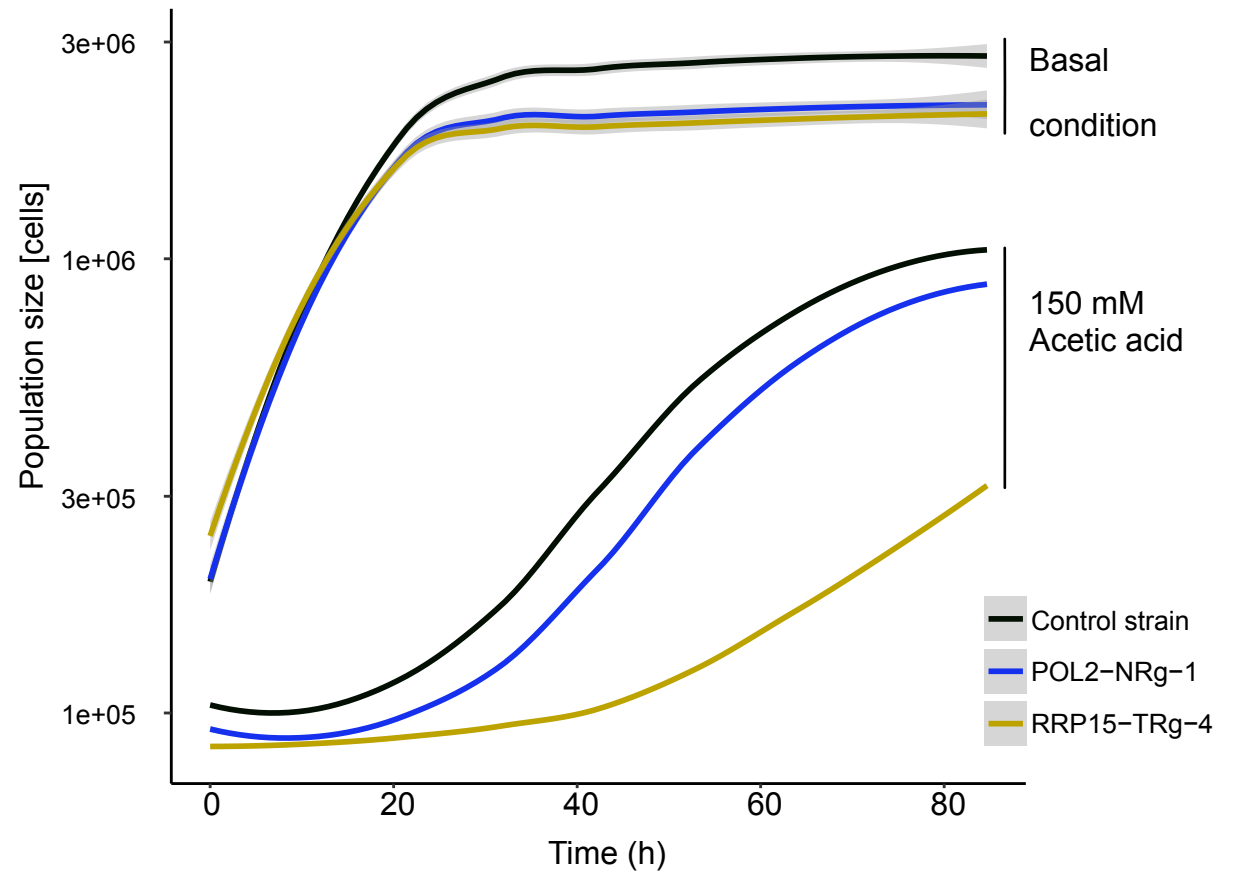

Figure 1

### A Repeatability of screen

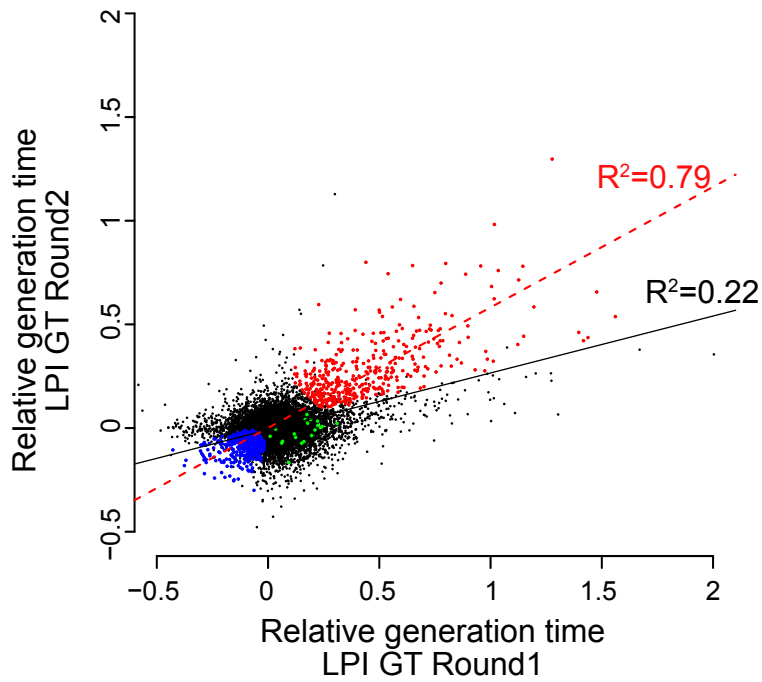

### B Normalized Growth in basal and in 150mM of acetic acid

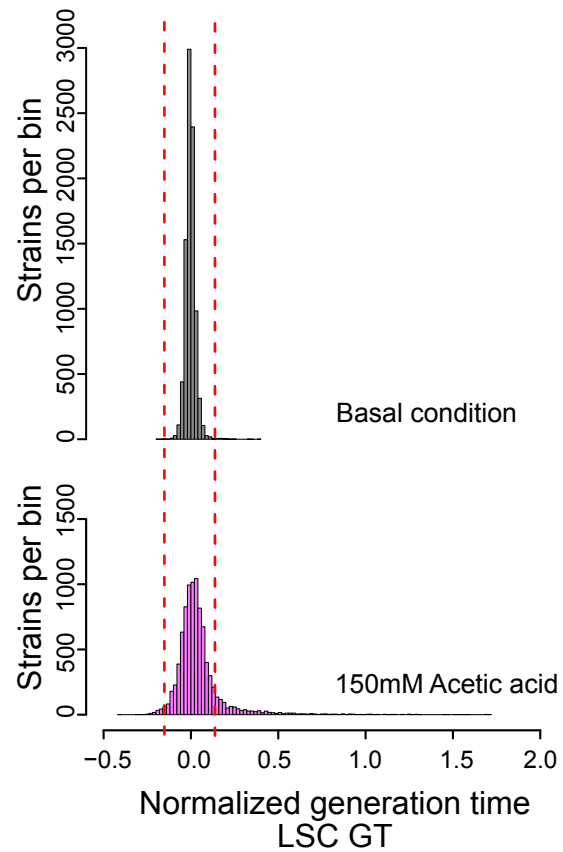

### C Selection of sensitive and tolerant strains

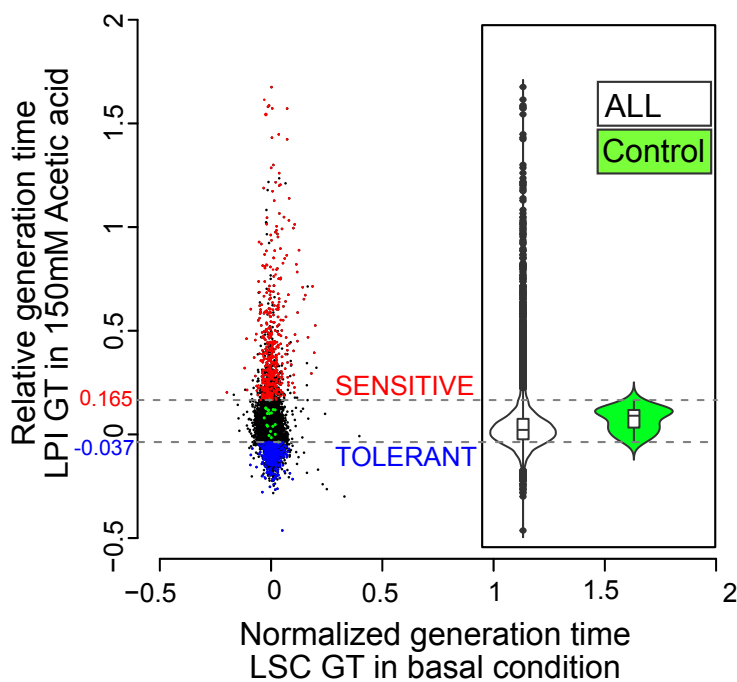

### D Classification of tolerant and sensitive strains based on Gene category

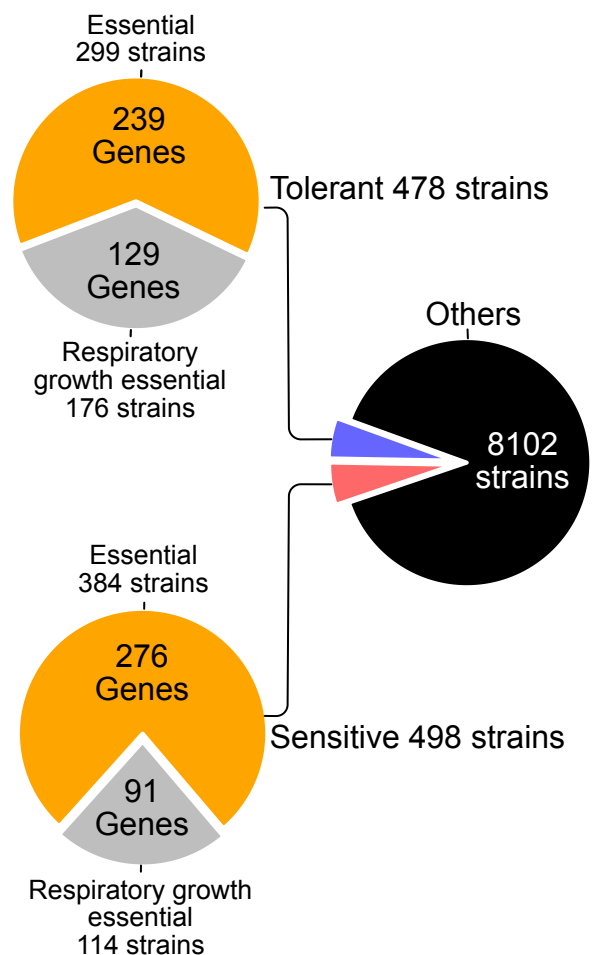

Figure 2



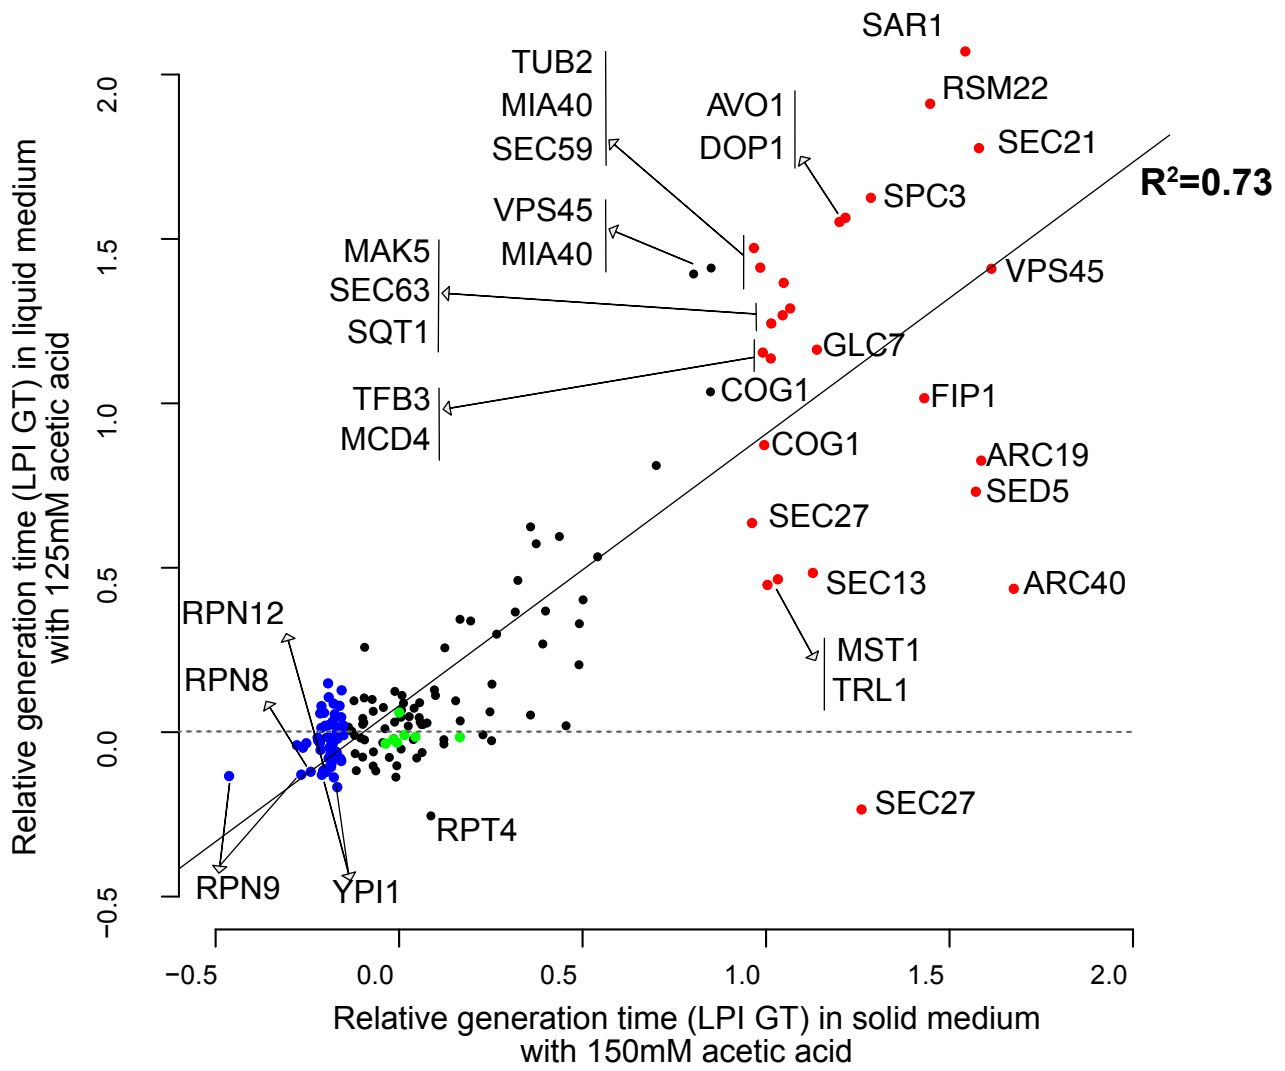

Figure 3

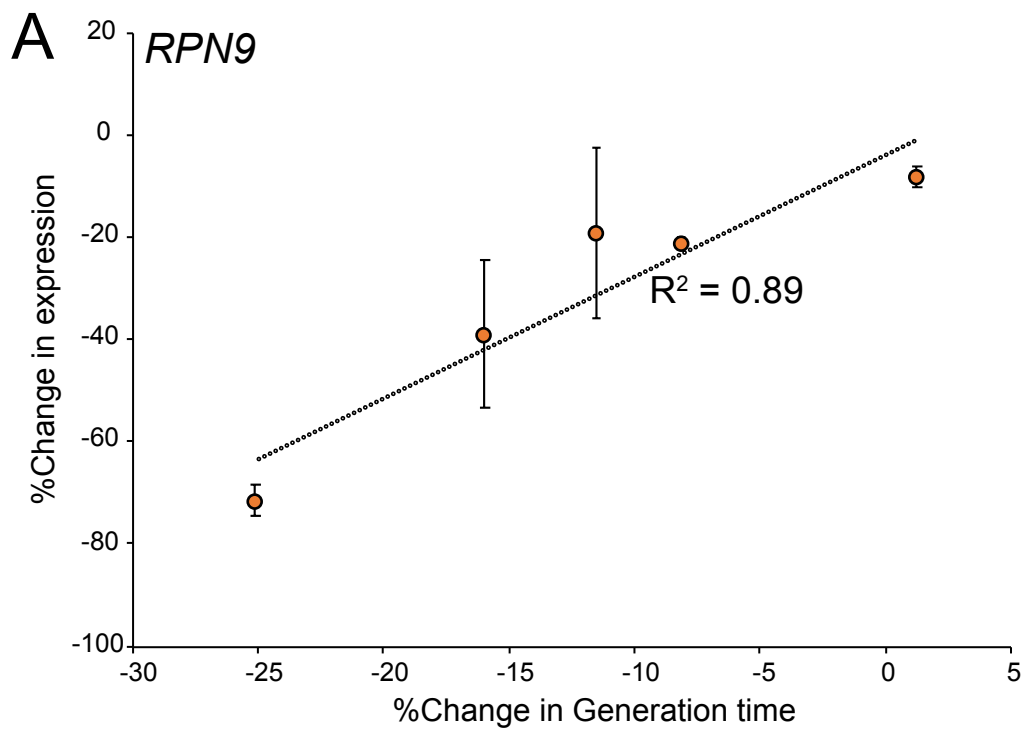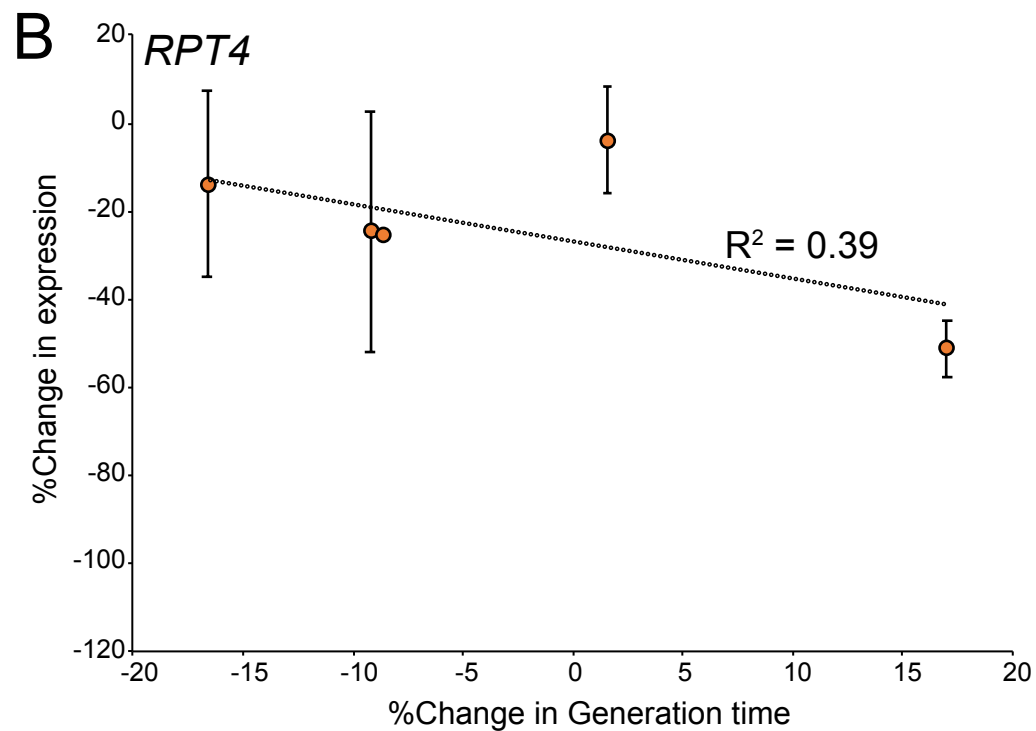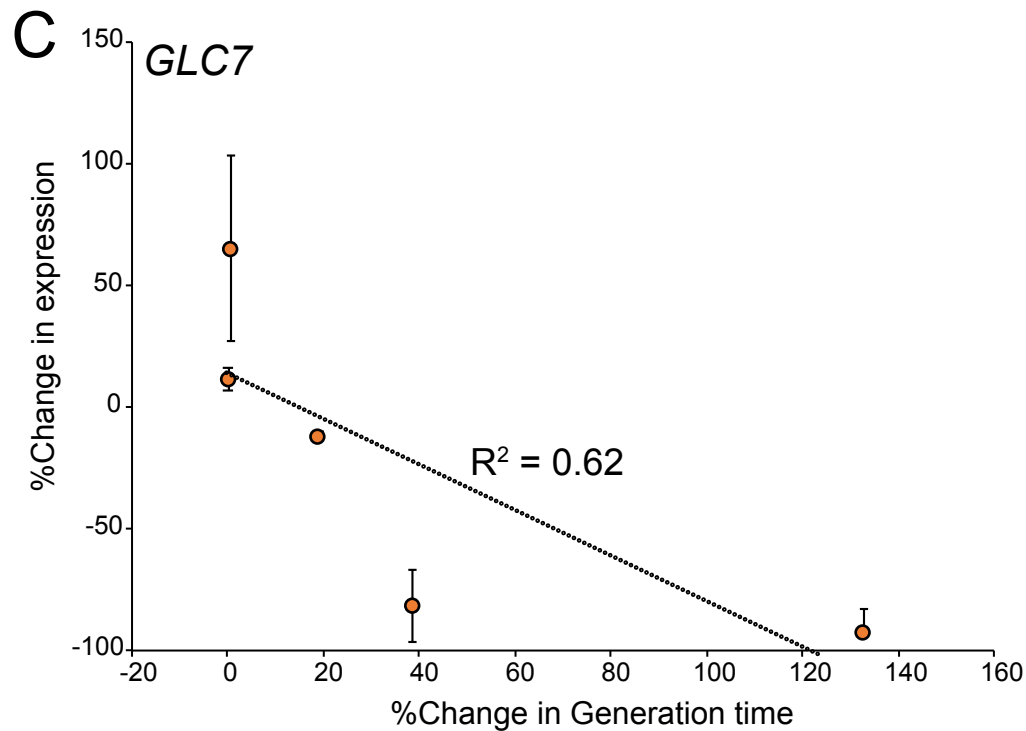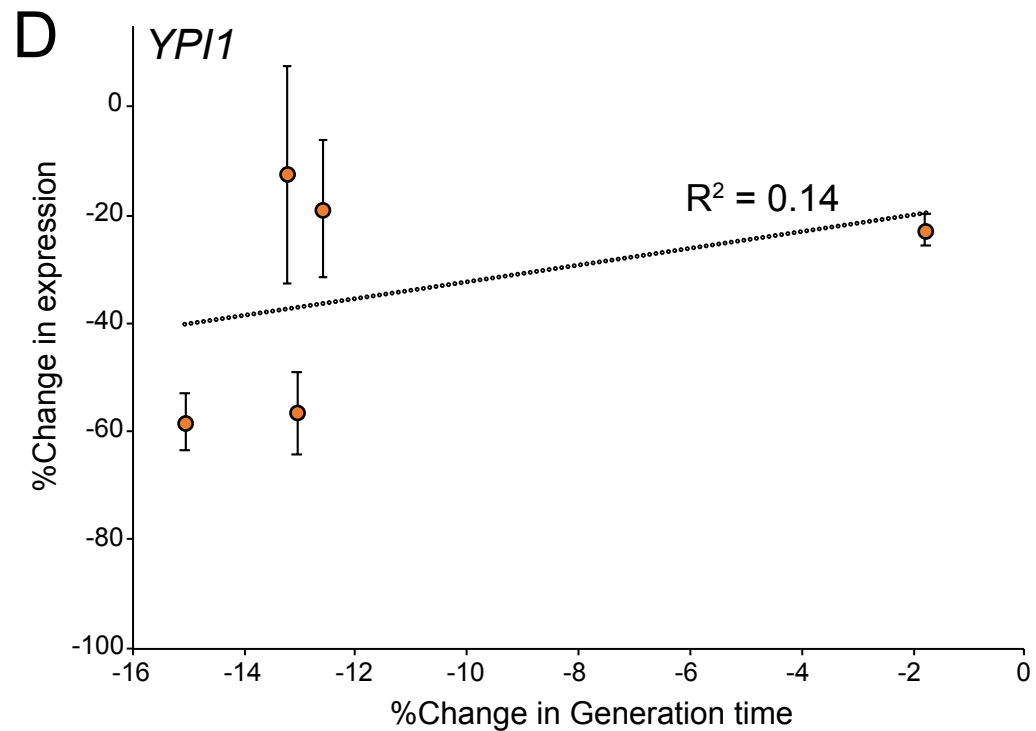

Figure 4

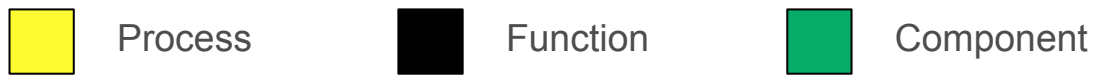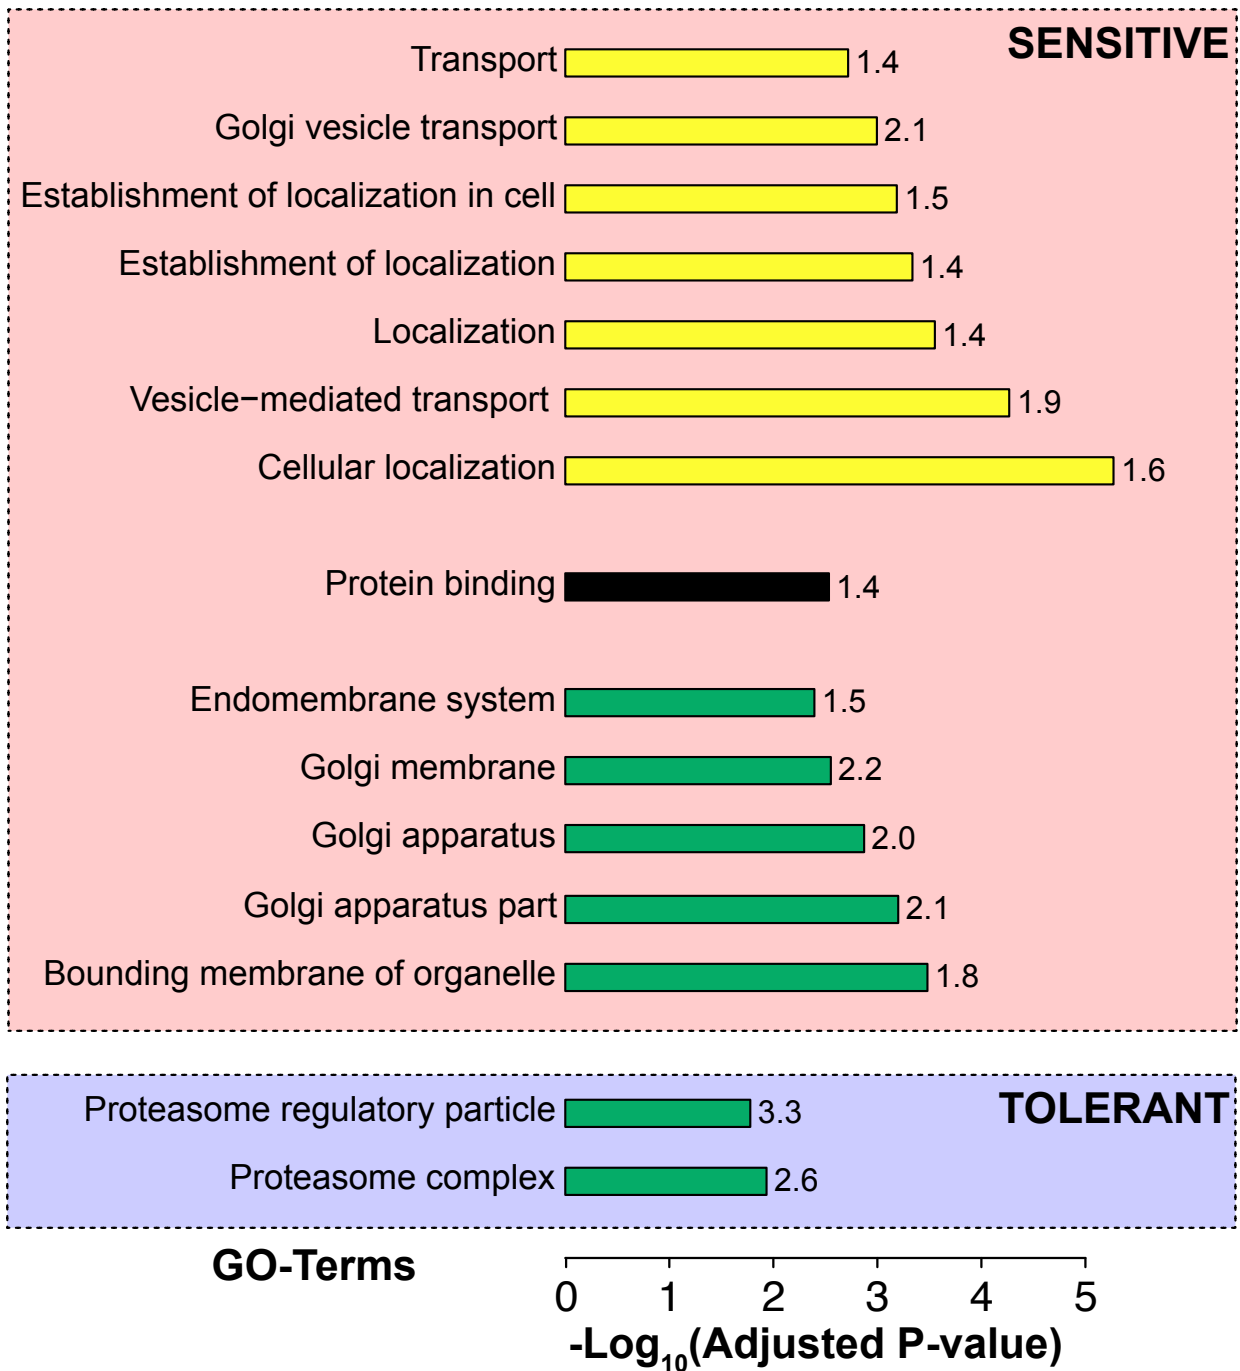

Figure 5

% Change in Relative GT

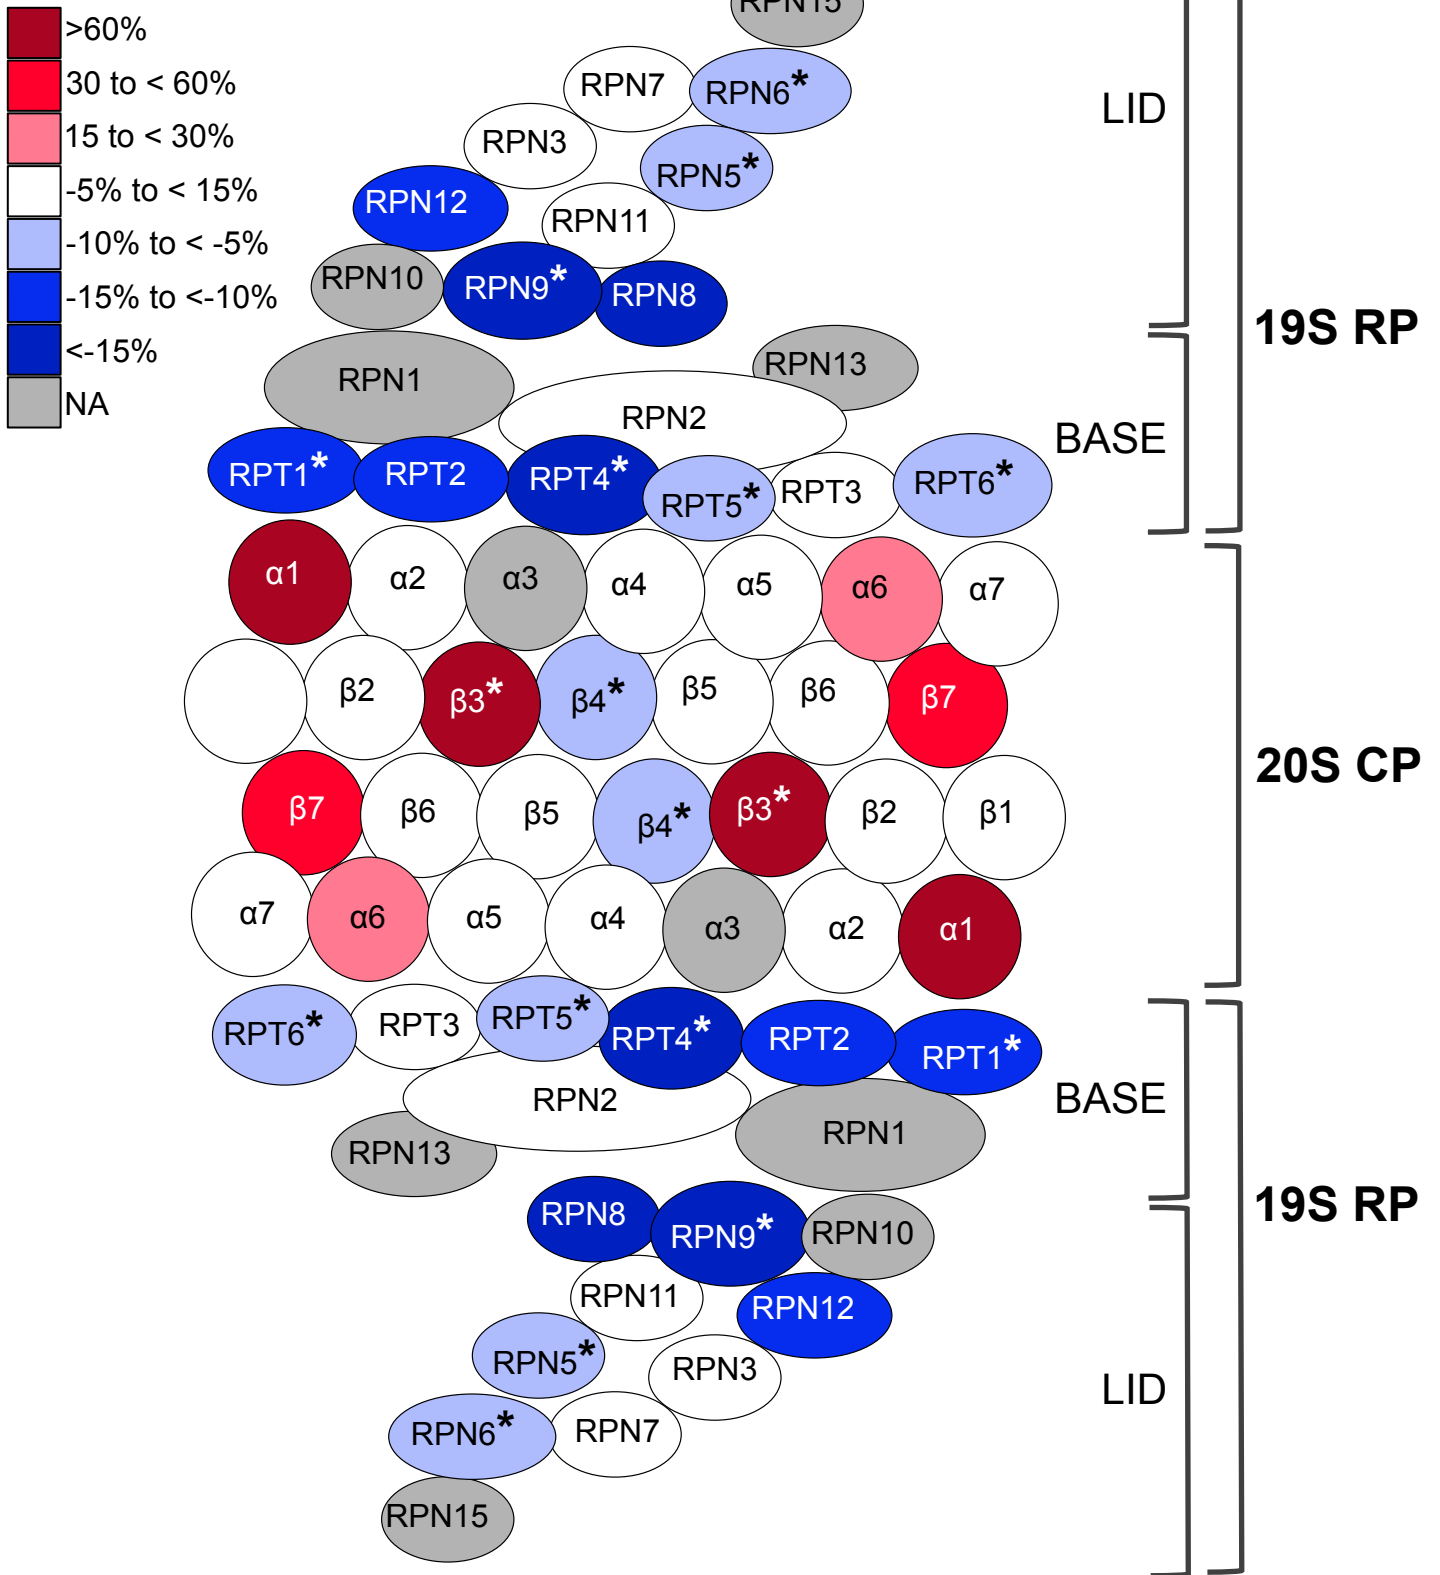

Figure 6

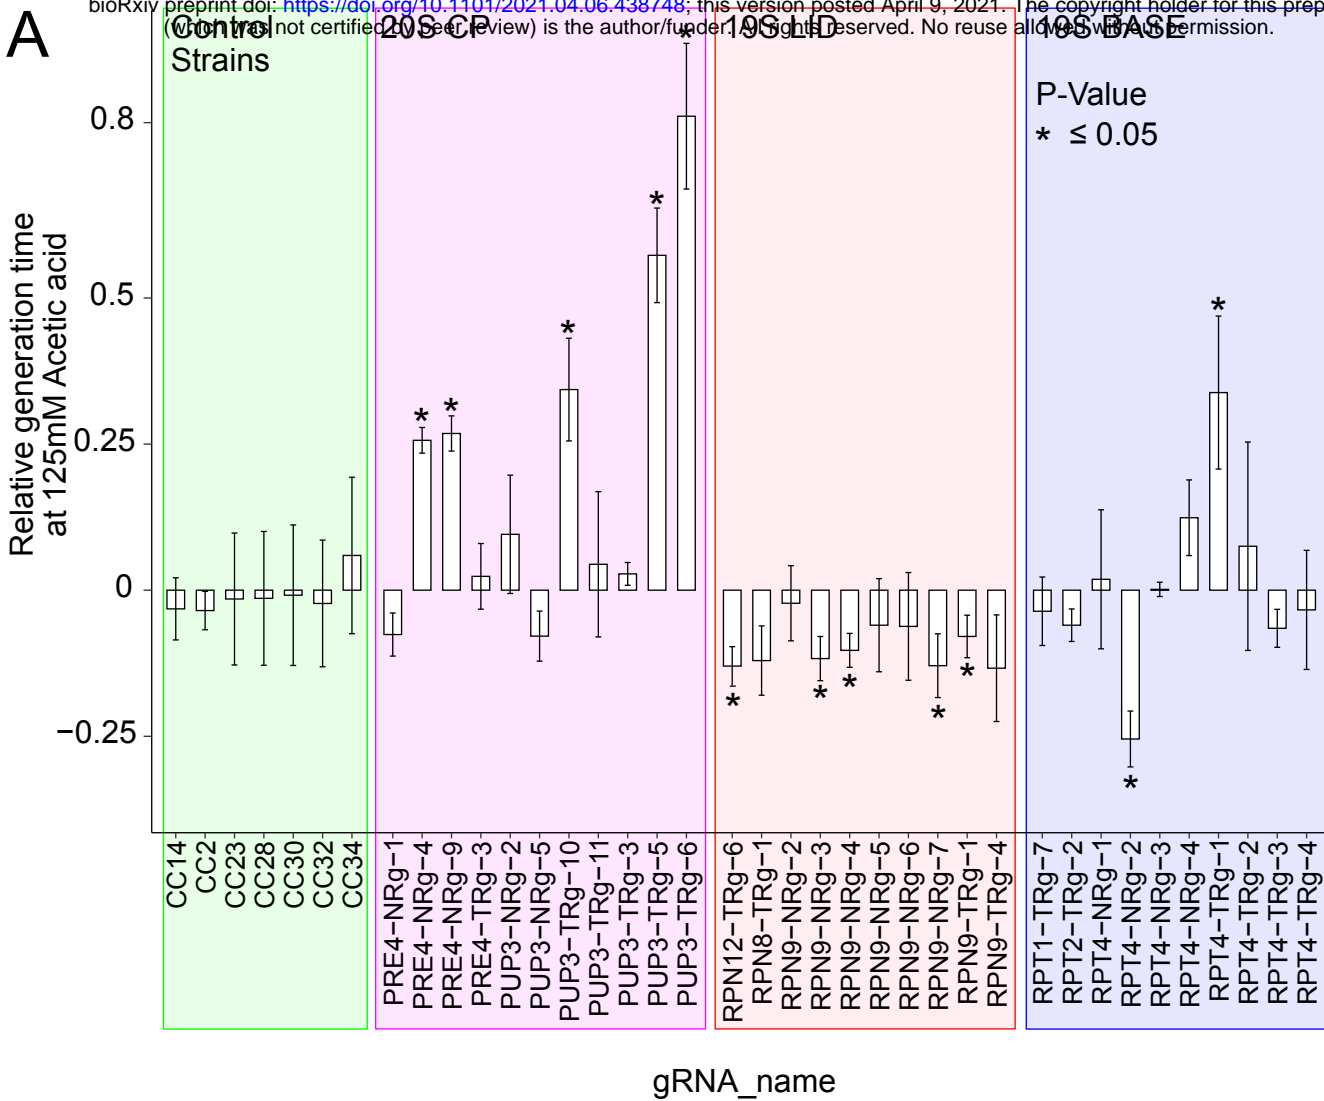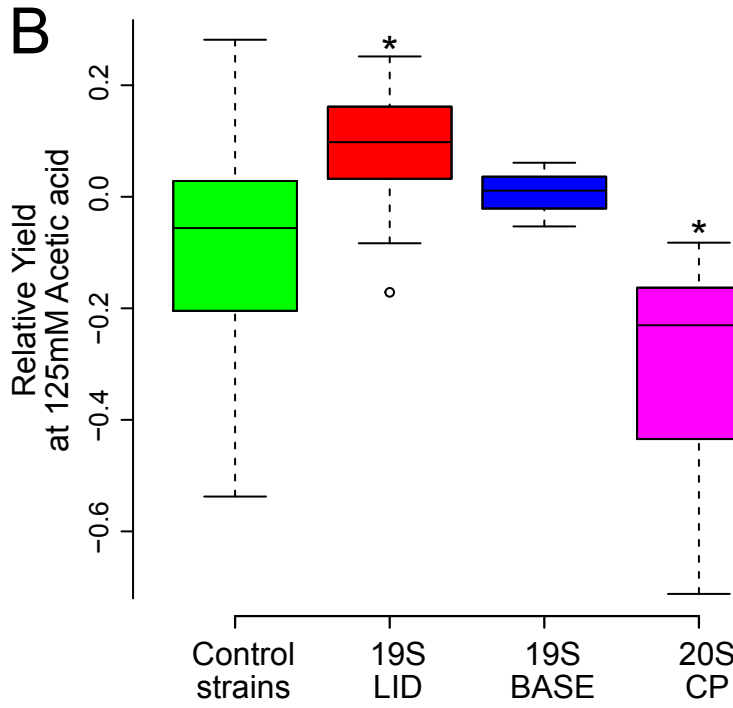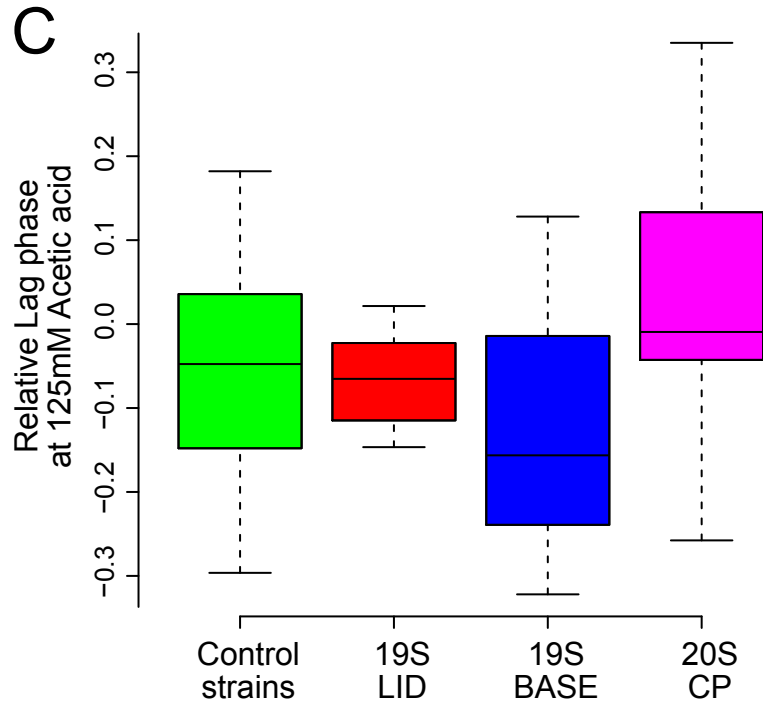

Figure 7

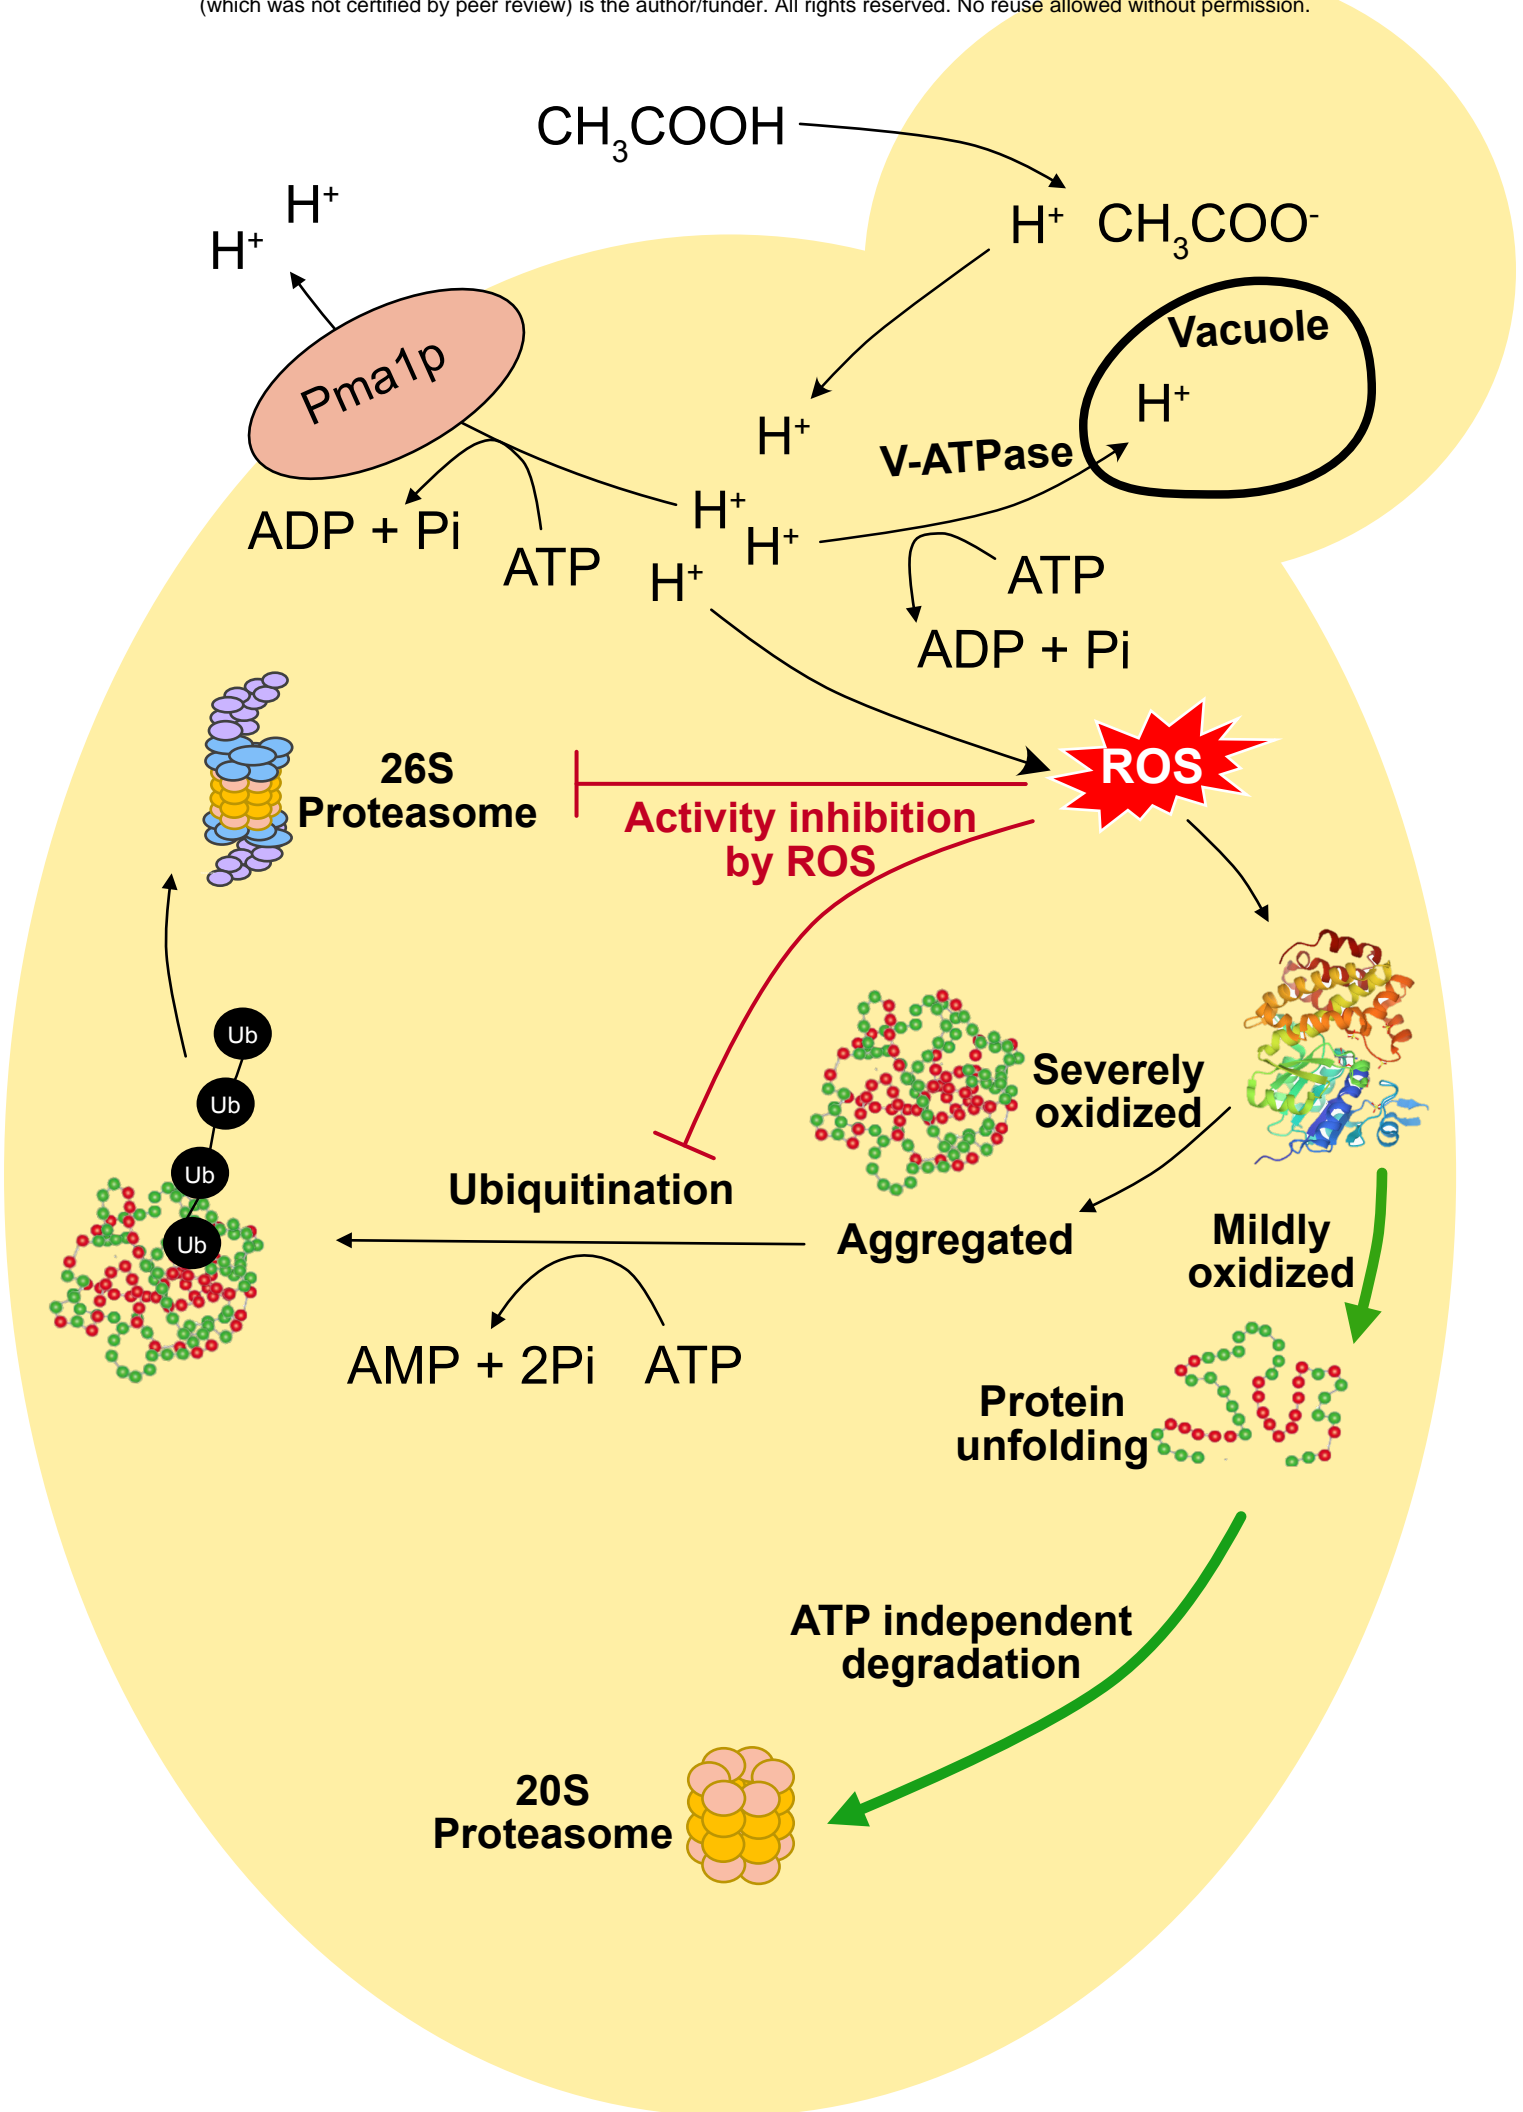

Figure 8
